# Supplementary material for: Thermal stress accelerates Arabidopsis thaliana mutation rate
Source: PubMed Central journal article supplement — Genome Res. 2021 Jan;31(1):40–50. doi: 10.1101/gr.259853.119 (PMC7849391; doi:10.1101/gr.259853.119), 2021-01
Supplement: supp_gr.259853.119_Supplemental_Material_Final.pdf [file supp_gr.259853.119_Supplemental_Material_Final.pdf]

# Supplemental Material

## **Thermal stress accelerates *Arabidopsis thaliana* mutation rate**

Eric J. Belfield<sup>1\*</sup>, Carly Brown<sup>1</sup>, Zhong Jie Ding<sup>1,2</sup>, Lottie Chapman<sup>1,3</sup>, Mengqian Luo<sup>1,4</sup>, Eleanor Hinde<sup>1</sup>, Sam W. van Es<sup>1,5</sup>, Sophie Johnson<sup>1</sup>, Youzheng Ning<sup>1,6</sup>, Shao Jian Zheng<sup>2</sup>, Aziz Mithani<sup>7\*</sup> and Nicholas P. Harberd<sup>1\*</sup>

<sup>1</sup>Department of Plant Sciences, University of Oxford, South Parks Road, Oxford OX1 3RB;

<sup>2</sup>State Key Laboratory of Plant Physiology and Biochemistry, College of Life Sciences, Zhejiang University, Hangzhou, 310058 China;

<sup>3</sup>Faculty of Sciences, University of Geneva, Quai Ernest-Ansermet 30, Geneva 1211, Switzerland;

<sup>4</sup>Centre for Cell & Developmental Biology and State Key Laboratory of Agrobiotechnology, School of Life Sciences, The Chinese University of Hong Kong, Shatin, New Territories, Hong Kong, China;

<sup>5</sup>Department of Plant Physiology, Umeå Plant Science Centre, Umeå University, Umeå, Sweden;

<sup>6</sup>Department of Plant Sciences, University of Cambridge, Downing Street, Cambridge, CB2 3EA;

<sup>7</sup>Department of Biology, Syed Babar Ali School of Science and Engineering, Lahore University of Management Sciences (LUMS), DHA, Lahore 54792, Pakistan.

**A**

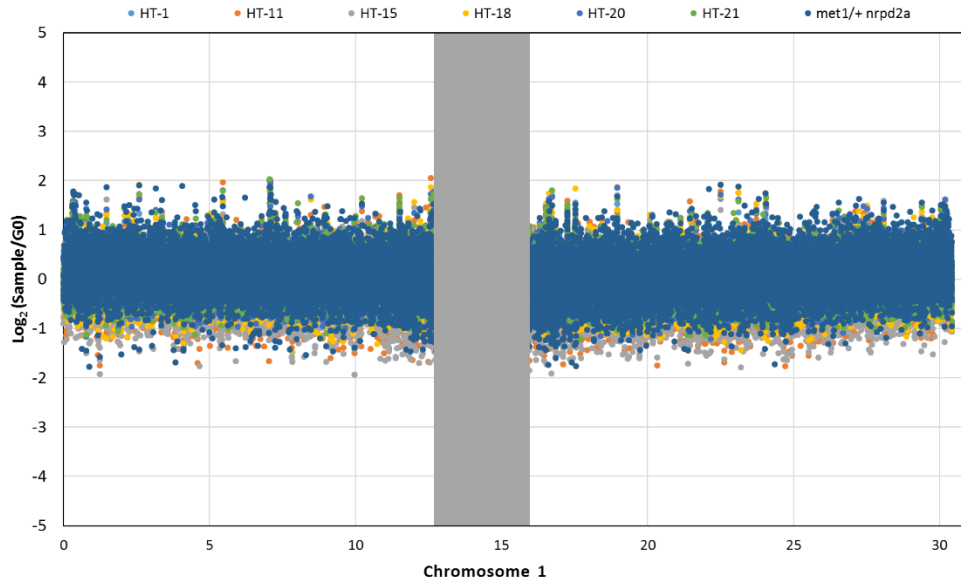

**B**

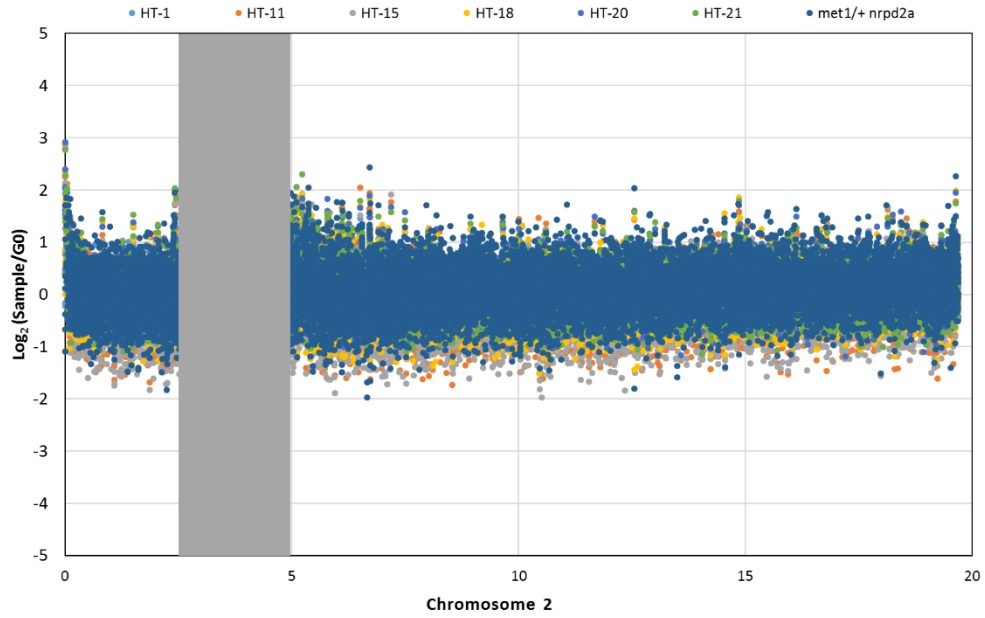

**C**

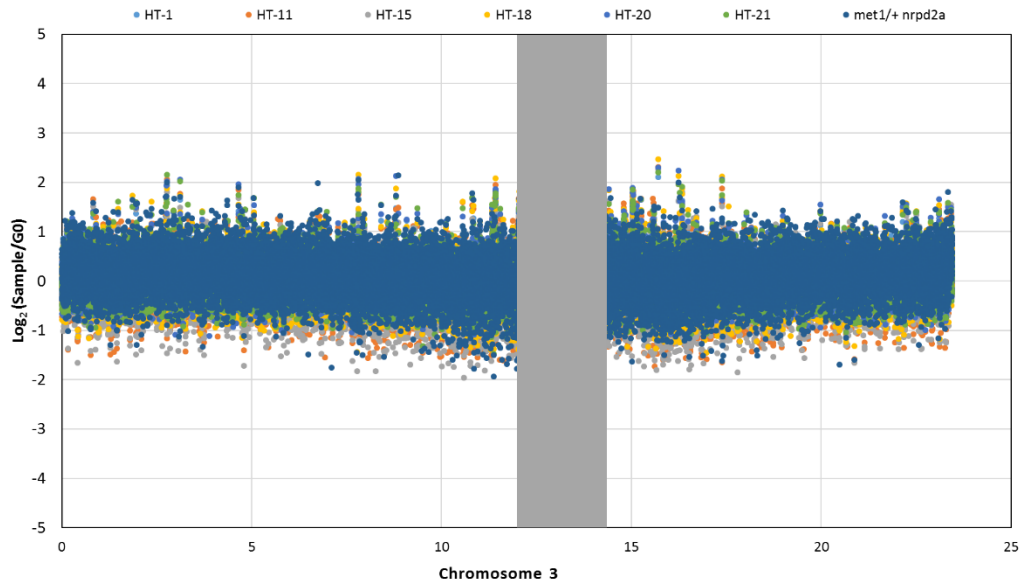

**D**

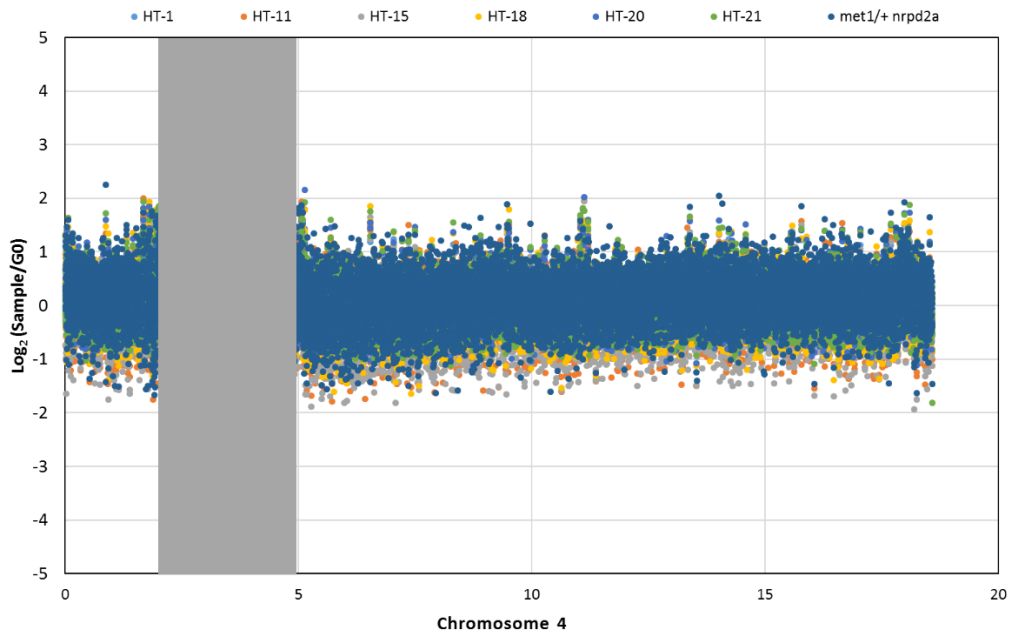

**E**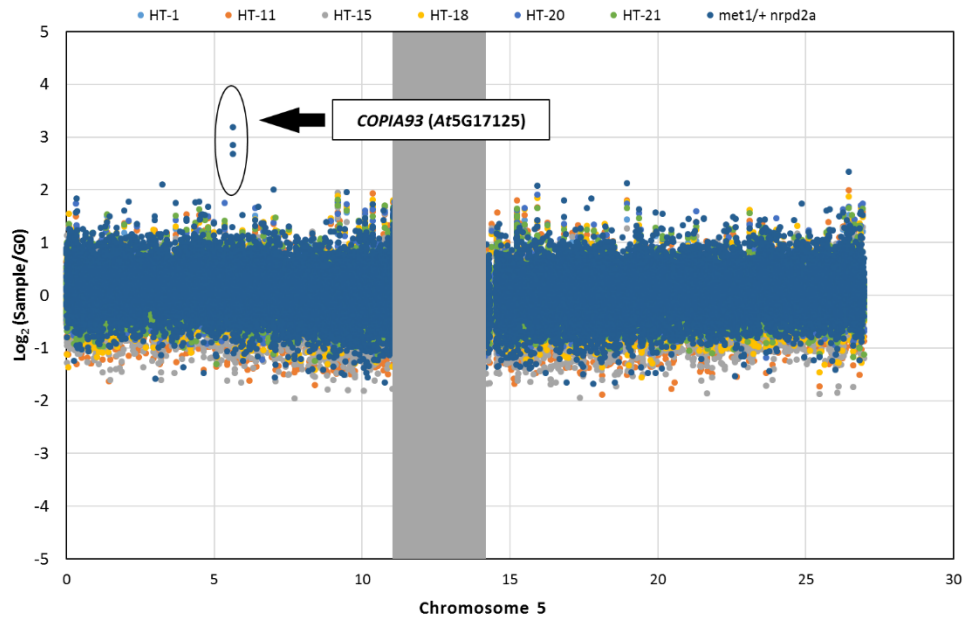

**Supplemental Fig. 1.** Genomes of HT-grown MA plants lack detectable Copy Number Variants (CNVs). Dot scatter-plots show log<sub>2</sub> coverage ratio of reads from G11 HT MA line plants, together with a positive control dataset (*met1/+ nrpd2a* (Mirouze et al. 2009)), as compared with G0 ancestor reads (Jiang et al. 2014), and presented chromosome-by-chromosome (A–E, Chromosomes 1–5). The blue dots cluster around 0 and are the most visible because the *met1/+ nrpd2a* data that they represent were the last entered into the plots. Other dot colors indicate data from individual G11 HT MA line plants, as indicated, and represent consecutive 1000 bp windows from across TAIR10. The greyed-out sections of chromosome represent centromeres. The circled and black arrowed dots in (D) represent the CNV-generating transposition of *AtCOPIA93* (positive control (Mirouze et al. 2009)). Any CNVs would be expected to result in a log<sub>2</sub> score value of  $\geq 1$ . Dots with log<sub>2</sub> score values  $\geq 1$  were therefore visually checked using IGV (see Methods). However, none were verified as being genuine CNVs, indicating that HT growth does not detectably increase the frequency of larger-scale indel mutations during genome replication.

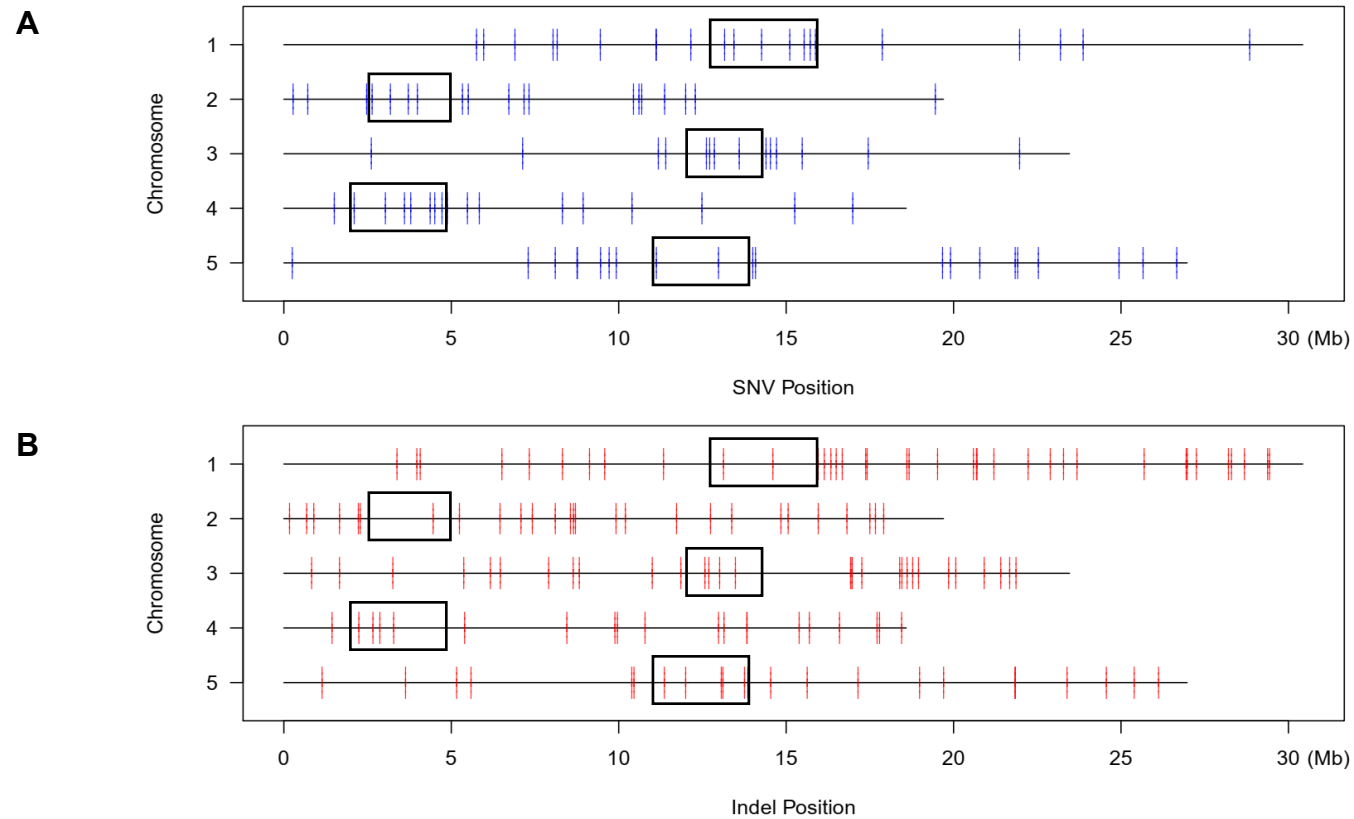

**Supplemental Fig. 2.** HT-induced mutations appear to be evenly spread across *Arabidopsis* chromosomes. Chromosomal distribution of SNVs (A) and indel (B) mutations in G11 HT-grown MA line plants. Chromosomal locations of mutations on the five *Arabidopsis* chromosomes (represented as horizontal black lines, length in megabases as shown) are represented by single vertical colored lines ((A) 92 SNVs, blue; (B) 138 indels, red). Peri-centromeric regions of each chromosome are indicated with rectangular black boxes.

**A**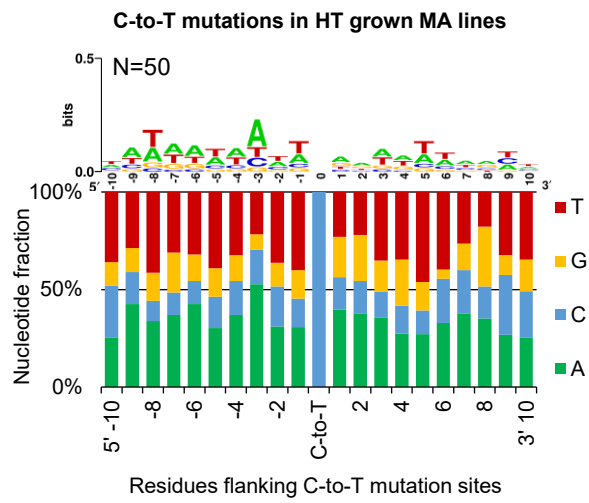**B**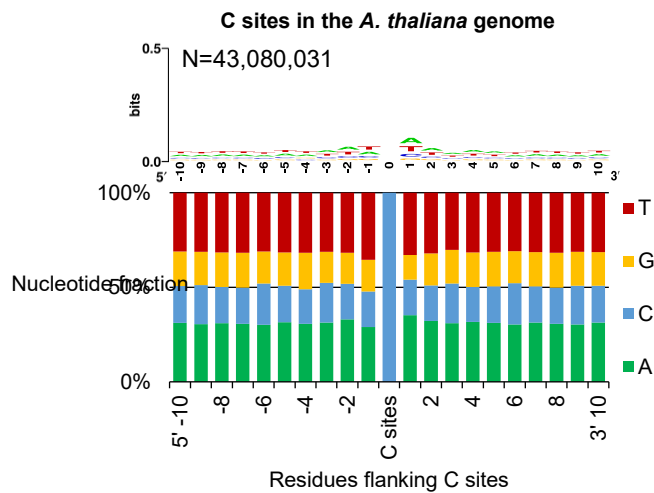**C**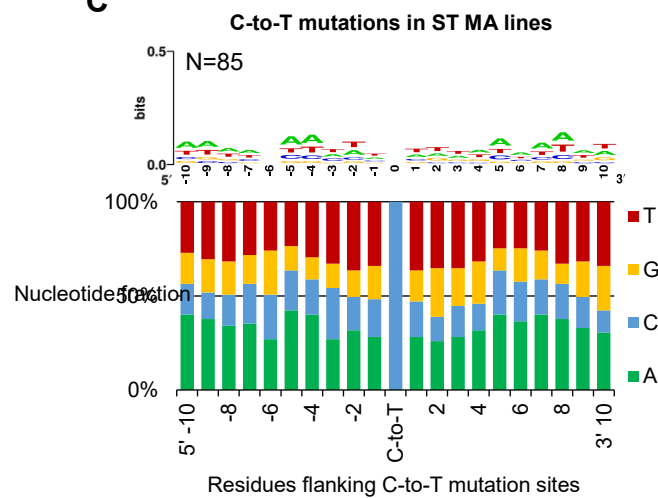

**Supplemental Fig. 3.** HT-induced GC-to-AT transitions may occur preferentially in particular sequence locations. Nucleotide flanking sequences ten bases upstream (5') and downstream (3') of

GC-to-AT transitions mutation site are shown as stacked columns and as sequence logos (Schneider and Stephens 1990; Crooks et al. 2004). (A) The combined 18 C-to-T and 32 reverse complemented G-to-A to C-to-T mutations in G11 HT MA line plants. (B) All C and all reverse complemented G sites in TAIR10. (C) The combined 47 C-to-T and 38 reverse complemented G-to-A to C-to-T mutations identified in ST-grown MA line plants (Ossowski et al. 2010; and Jiang et al. 2014). Comparison of the sequence logos (A–C) showed enrichment for an A residue at the 5' -3 position to the mutated GC-to-AT transitions (A) in HT-grown plants versus TAIR10 (B) and ST-grown plants (C). A second residue, a G, at the 3' +8 position to the mutated GC-to-AT transitions in HT-grown plants (A) showed no enrichment versus TAIR10 (B) but did however show enrichment versus ST-grown plants (C), see main Results section: HT growth boosts SNV frequency and maintains GC-to-AT bias, for further details. Sequence logos provide graphical representations of the relative frequencies of individual nucleotide residues with respect to position within flanking sequences. Individual residues are shown as stacked letters, along with the number of sites (combined C and reverse complemented G-to-A to C-to-T) considered (shown as N). The letters are ordered from most (top) to least (bottom) frequent in each stack. Overall stack indicates sequence conservation at that position (measured in bits), while the letter height indicates the relative frequency of each nucleotide (A, T, C or G) at that position (Crooks et al. 2004).

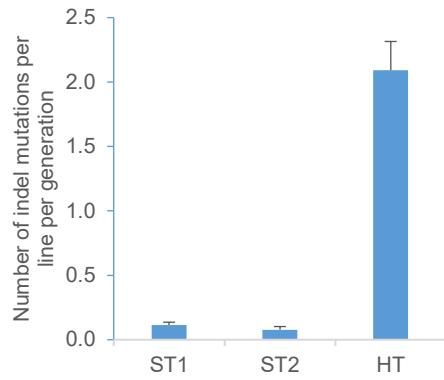

**Supplemental Fig. 4.** HT-growth increases the frequency of indel mutations. Comparison of the frequency of indels (insertions and deletions) in G11 HT MA lines with that of ST controls (ST1, data from Ossowski et al. 2010; ST2, data from Jiang et al. 2014). Error bars indicate SEM from 5 (ST1 data), 9 (ST2 data), or 6 (HT data) biological replicates.

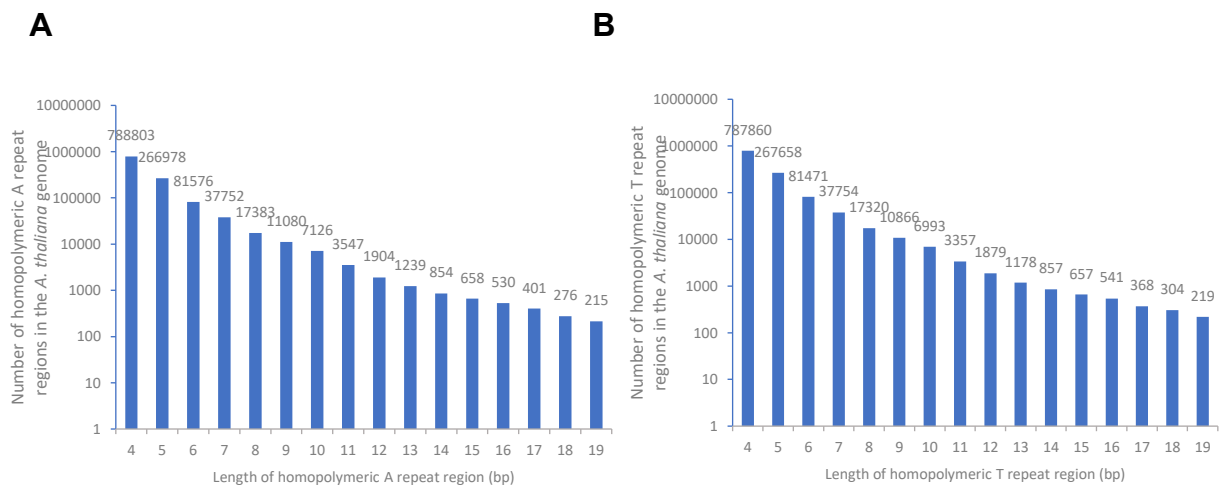

**Supplemental Fig. 5.** The frequency of homopolymeric repeat stretches within the *Arabidopsis* genome decreases with increasing stretch length. The frequency of homopolymeric A (A) or T (B) repeat stretches in the TAIR10 reference genome is plotted with respect to stretch length (data from (Belfield et al. 2018)).



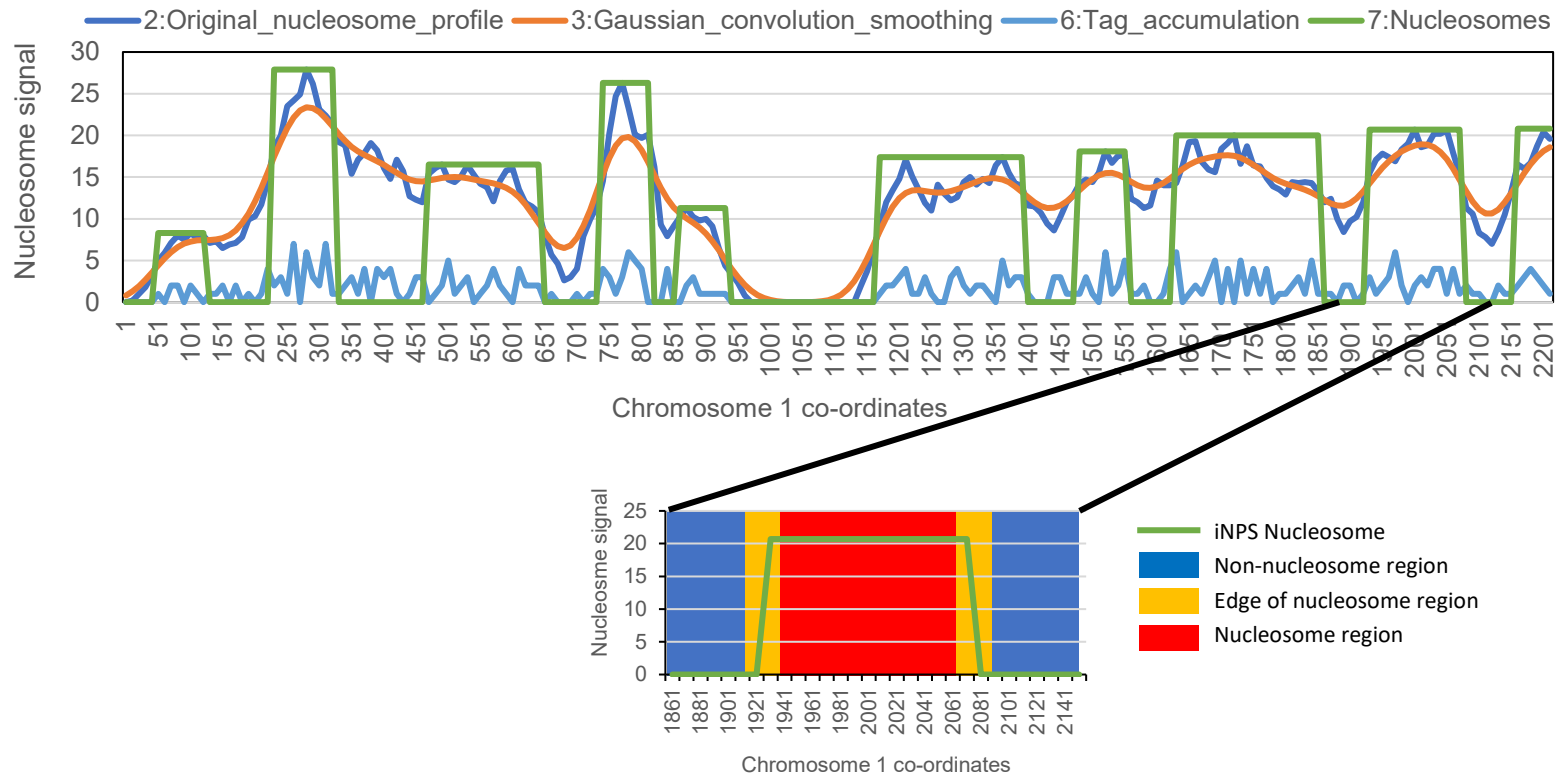

**Supplemental Fig. 6.** Nucleosome occupancy in an example segment of *A. thaliana* Chromosome 1. Illumina sequencing was performed on MNase-digested genomic DNA from ST- and HT-grown plants. The top panel shows nucleosome occupancy of a 2.2kb region of Chromosome 1 (from ST-grown plants) predicted by nucleosome-positioning algorithm iNPS (Chen et al. 2014) from the MNase-seq data. The bottom panel shows a zoomed-in region (co-ordinates 1,861 – 2,141bp) of Chromosome 1 showing a single predicted nucleosome. Nucleosomic regions are classified as: nucleosome (red block), non-nucleosome (blue block) and edge of nucleosome (yellow block) regions.

**A**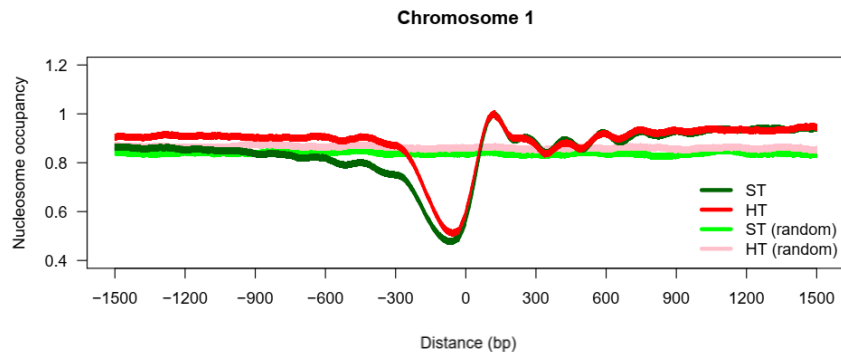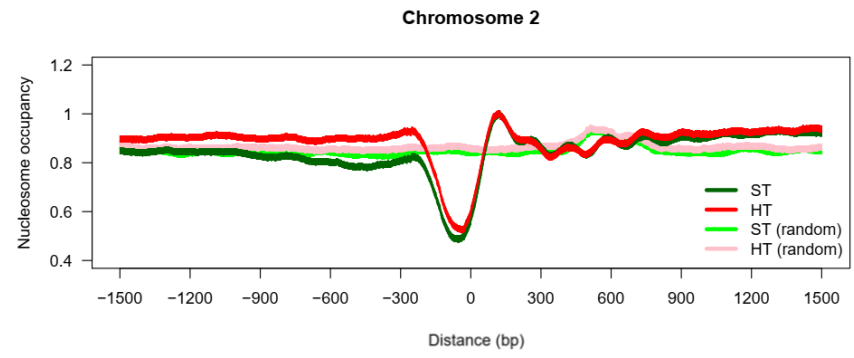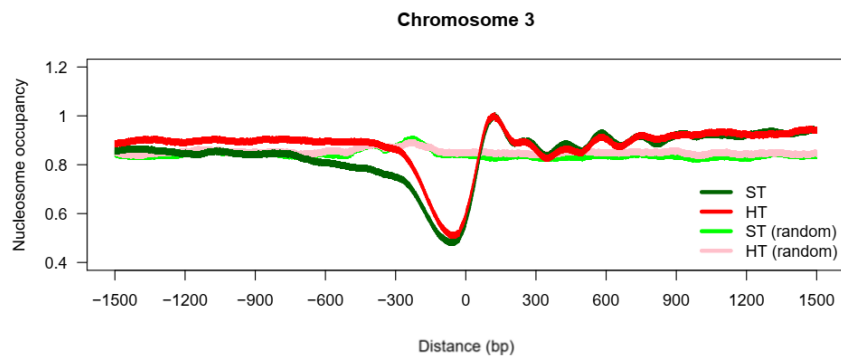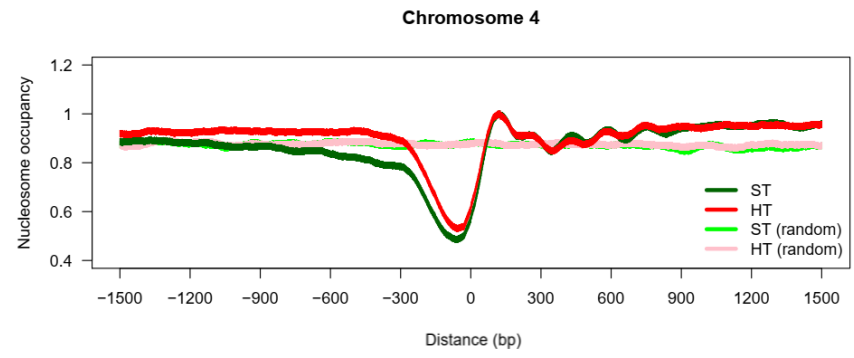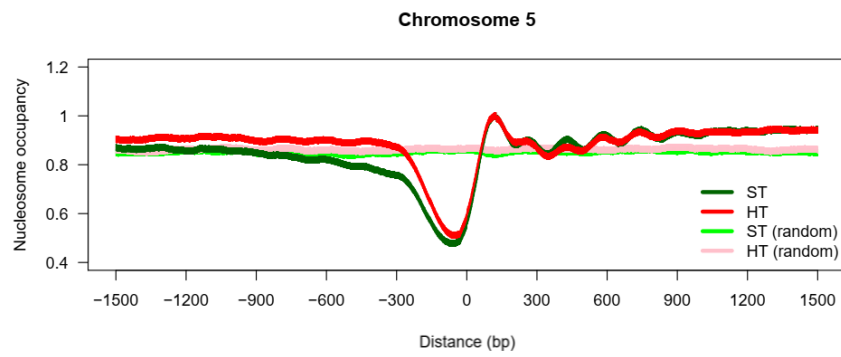

**B**

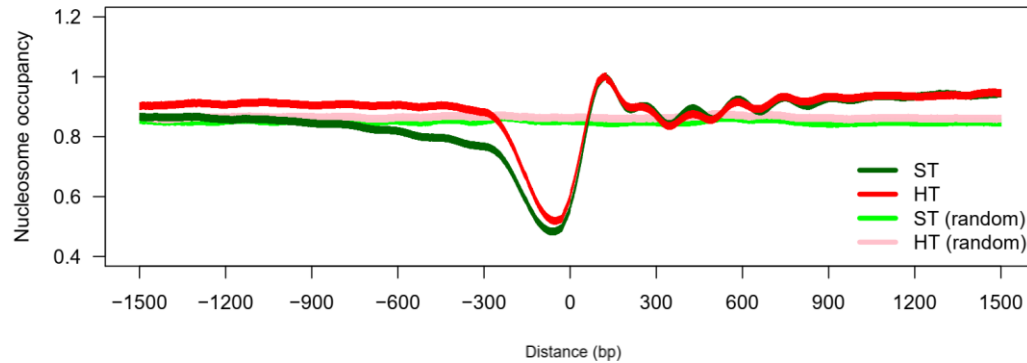

**Supplemental Fig. 7.** Comparison of the effect of growth temperature on nucleosome occupancy at Transcription Start Sites (TSS) versus at random positions across the genome. (A) Relative nucleosome occupancy in the vicinity of the TSS of all *A. thaliana* genes. Occupancy plots show the average nucleosomal coverage with respect to distance (bp) from the TSS in HT-grown (dark red trace), versus ST-grown (dark green trace) plants, presented on a chromosome-by-chromosome basis (plots show merged +ve and -ve DNA strands). Comparison traces show average nucleosome coverage with respect to distance (bp) from randomly chosen chromosomal positions in HT-grown (pink) and ST-grown (light green) plants. (B) Merged data for Chromosomes 1–5. Data are normalized to the highest value for each chromosome. The sites of the randomly chosen positions were determined by using the number of TSS sites (28,496) to divide the length of the genome (120Mb/28,496 $\approx$ 4.2kb), then taking points every ~4.2kb from the beginning of each of the 5 Chromosomes.

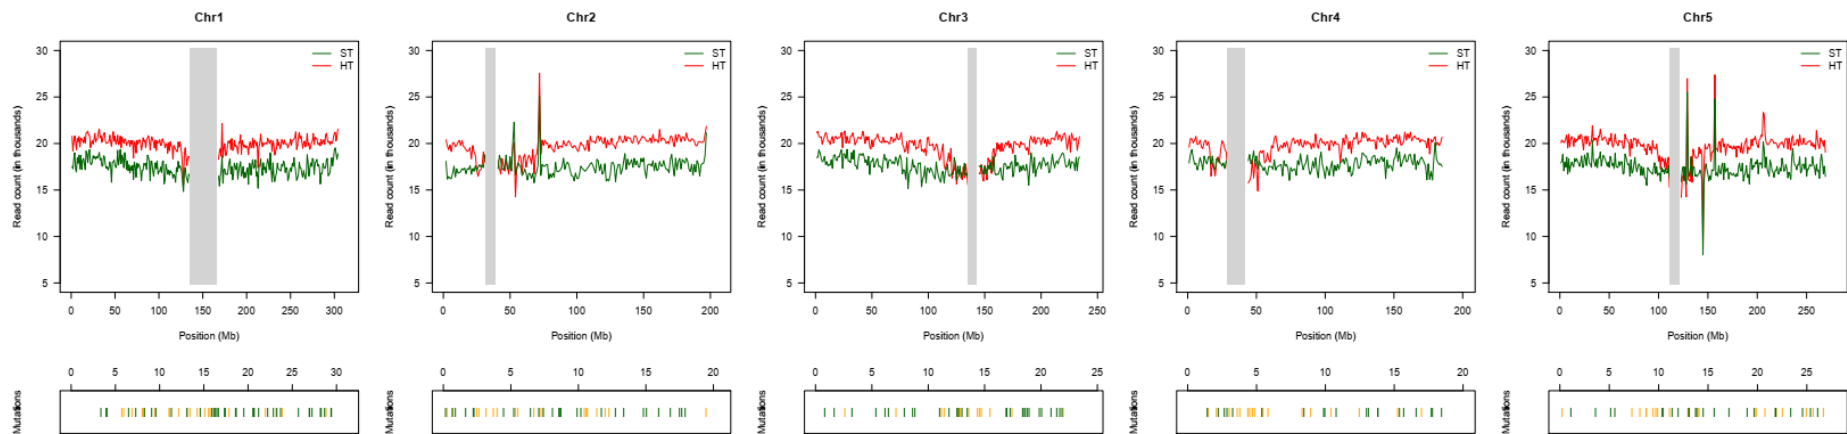

**Supplemental Fig. 8.** MNase-seq read-density and mutation distribution along chromosome arms. Nucleosome read count density in 100-kb tiles is plotted for HT-grown (red) and ST-grown (green) plants. Nucleosome-enriched pericentromeric regions are greyed out. Also shown are the chromosomal locations of HT-induced mutations (SNVs, yellow vertical lines; indels, green vertical lines).

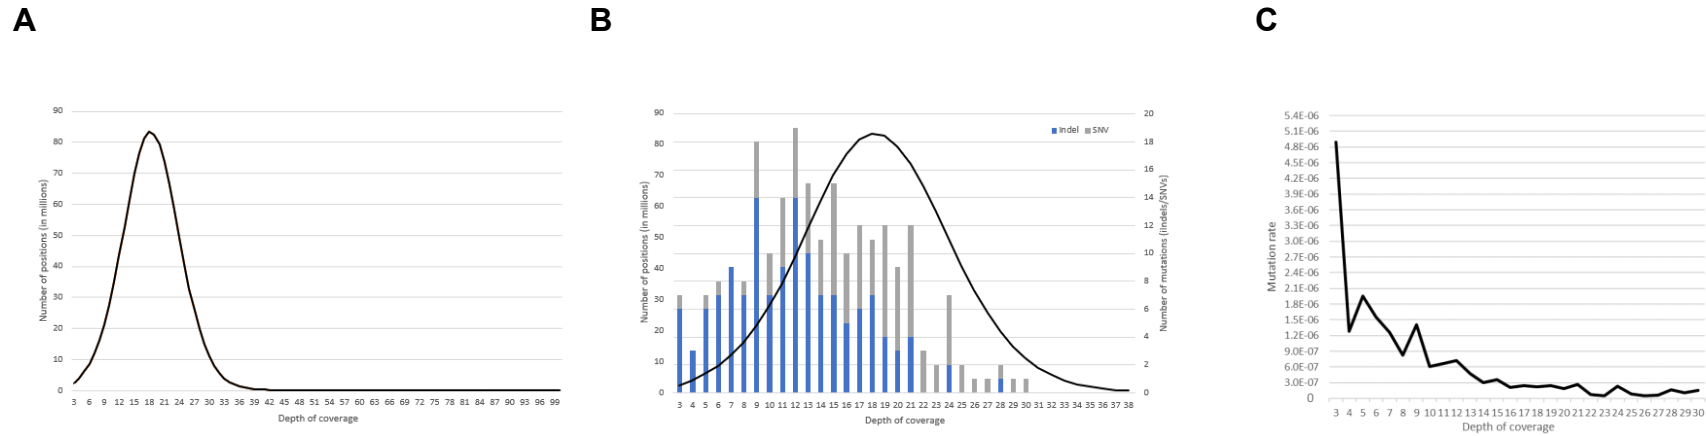

**Supplemental Fig. 9.** The relationship between read coverage depth and frequency of detected mutation. (A) Numbers of TAIR10 genomic positions averaged across six G11 HT MA lines (x-axis) and plotted against the read coverage (y-axis). (B) A zoomed-in view of (A) overlaid with a histogram display of the 230 mutations (138 indels, blue bars; 92 SNVs, grey bars (right y-axis); Supplementary Table 2) detected in the six G11 HT MA lines. (C) A plot of mutation rates versus depth of coverage for the 230 mutations found in six G11 HT MA lines.

| Line  | Illumina paired-end read length (bp) | Raw sequencing data |                                 |                       | Aligned sequencing data |                                 |                       | Total number of sites covered (million) |
|-------|--------------------------------------|---------------------|---------------------------------|-----------------------|-------------------------|---------------------------------|-----------------------|-----------------------------------------|
|       |                                      | Number of reads     | Total number of bases sequenced | Genome fold coverage* | Number of Reads         | Total number of bases sequenced | Genome fold coverage* |                                         |
| CT-2  | 100                                  | 35,822,644          | 3,582,264,400                   | 30.1                  | 30,499,439              | 3,049,943,900                   | 25.6                  | 118,674,753                             |
| CT-4  | 100                                  | 32,273,474          | 3,227,347,400                   | 27.1                  | 28,048,073              | 2,804,807,300                   | 23.5                  | 118,682,089                             |
| CT-6  | 100                                  | 32,426,492          | 3,242,649,200                   | 27.2                  | 27,711,819              | 2,771,181,900                   | 23.3                  | 118,565,154                             |
| CT-10 | 100                                  | 32,260,792          | 3,226,079,200                   | 27.1                  | 27,689,284              | 2,768,928,400                   | 23.2                  | 118,674,324                             |
| CT-12 | 100                                  | 32,337,888          | 3,233,788,800                   | 27.1                  | 26,396,211              | 2,639,621,100                   | 22.2                  | 118,674,951                             |
| HT-1  | 100                                  | 33,932,676          | 3,393,267,600                   | 28.5                  | 27,462,253              | 2,746,225,300                   | 23.0                  | 118,471,548                             |
| HT-11 | 100                                  | 33,743,230          | 3,374,323,000                   | 28.3                  | 27,818,608              | 2,781,860,800                   | 23.3                  | 118,381,764                             |
| HT-15 | 100                                  | 35,694,470          | 3,569,447,000                   | 30.0                  | 29,549,929              | 2,954,992,900                   | 24.8                  | 118,141,545                             |
| HT-18 | 100                                  | 34,000,868          | 3,400,086,800                   | 28.5                  | 27,134,763              | 2,713,476,300                   | 22.8                  | 118,436,561                             |
| HT-20 | 100                                  | 33,885,734          | 3,388,573,400                   | 28.4                  | 26,989,657              | 2,698,965,700                   | 22.7                  | 118,483,579                             |
| HT-21 | 100                                  | 34,807,454          | 3,480,745,400                   | 29.2                  | 27,953,947              | 2,795,394,700                   | 23.5                  | 118,462,564                             |

**Supplemental Table 1.** Whole genome sequencing data summary table. Genomic DNA from five independent G6 cold temperature (CT) MA line plants (CT-2, -4, -6, -10, -12) and six independent G11 high temperature (HT) MA line plants (HT-1, -11, -15, -18, -20, -21) were sequenced using 100bp paired-end Illumina sequencing technology. For each sample, >32 million raw sequencing data reads (>3.2 gigabases of data) were aligned to the TAIR 10 *A. thaliana* reference genome, resulting in a 22.2–25.6-fold sequencing coverage depth (aligned data) for each genome. The total number of TAIR10 sites having aligned sequence data coverage  $\geq 3$  and  $\leq 100$  is shown. \*The TAIR10 genome size of 119,146,348 bp was used to determine genome fold coverage.

| MA lineage | Coordinates   | Mutation size | TAIR10 reference | Mutation | Mutation location | Flanking indel mutation sequence*                   | Indel context       |
|------------|---------------|---------------|------------------|----------|-------------------|-----------------------------------------------------|---------------------|
| HT-21      | Chr1:15949261 | -2            | TA               | -        | Intergenic        | CATTG <b>TA</b> TATATATATATATATATATATTTAAA          | Dinucleotide repeat |
| HT-15      | Chr1:16142592 | 2             | -                | TA       | Intergenic        | GCAAG <b>ta</b> TATATATATATATATATATATAATTAT         | Dinucleotide repeat |
| HT-1       | Chr1:16342316 | -2            | GA               | -        | Intergenic        | GTGAG <b>GA</b> GAGAGAGAGAGAGAGAGTCAA               | Dinucleotide repeat |
| HT-20      | Chr1:16498351 | -2            | AT               | -        | Intergenic        | GAAAA <b>AT</b> TATATATATATATATATATATATACATA        | Dinucleotide repeat |
| HT-15      | Chr1:17377490 | -2            | TA               | -        | Intergenic        | TTTCT <b>TA</b> TATATATATATATATATATATATATATATATGTAG | Dinucleotide repeat |
| HT-21      | Chr1:17421944 | -2            | AT               | -        | Intergenic        | TATAA <b>AT</b> TATATATATATATATATATTTTTT            | Dinucleotide repeat |
| HT-18      | Chr1:18605859 | -2            | TA               | -        | Intergenic        | ATTTT <b>TA</b> TATATATATATATATTTAAA                | Dinucleotide repeat |
| HT-18      | Chr1:18672003 | 2             | -                | AT       | Intergenic        | CCTTA <b>at</b> ATATATATATATATATATATATGTGAA         | Dinucleotide repeat |
| HT-1       | Chr1:20593095 | -2            | CT               | -        | Intergenic        | TGACC <b>CT</b> CTCTCTCTCTCTCTCTTTGTT               | Dinucleotide repeat |
| HT-21      | Chr1:22232997 | 2             | -                | AT       | Intergenic        | TATGA <b>at</b> ATATATATATATATATATGGTAC             | Dinucleotide repeat |
| HT-1       | Chr1:29440434 | -2            | TA               | -        | Intergenic        | ATAAG <b>TA</b> TATATATATATTTAA                     | Dinucleotide repeat |
| HT-11      | Chr2:10205930 | 2             | -                | TA       | Intron            | GCTTT <b>at</b> ATATATATATATATATATATCCTTG           | Dinucleotide repeat |
| HT-20      | Chr2:13377446 | -2            | AT               | -        | Intergenic        | TCTTA <b>AT</b> ATATATATATATATATATATATAACAT         | Dinucleotide repeat |
| HT-15      | Chr2:14846624 | 2             | -                | AT       | Intergenic        | GTTTG <b>at</b> ATATATATATATATATATATATATATATATCA    | Dinucleotide repeat |
| HTHT-11    | Chr2:15061965 | 2             | -                | AT       | UTR               | CATAA <b>at</b> ATATATATATATATATACGTA               | Dinucleotide repeat |
| HT-1       | Chr2:1664191  | -2            | TA               | -        | Intergenic        | AATAC <b>TA</b> TATATATATATATATATTTAT               | Dinucleotide repeat |
| HT-20      | Chr2:2284706  | 2             | -                | AT       | Intergenic        | ACCGA <b>at</b> ATATATATATATATATATATATATATTTATGG    | Dinucleotide repeat |

|       |               |    |    |    |            |                                                     |                     |
|-------|---------------|----|----|----|------------|-----------------------------------------------------|---------------------|
| HT-21 | Chr2:6455752  | 2  | -  | TA | Intergenic | TTCTC <u>ta</u> TATATATATATATATAATTG                | Dinucleotide repeat |
| HT-15 | Chr2:683661   | 2  | -  | TC | UTR        | CTCTT <u>tc</u> TCTCTCTCTCTCTCTCTCTCTTTAT           | Dinucleotide repeat |
| HT-21 | Chr2:894394   | -2 | AT | -  | Intergenic | TATAC <u>AT</u> ATATATATATATATATATATTTTT            | Dinucleotide repeat |
| HT-11 | Chr3:11857854 | -2 | AT | -  | Intergenic | TAAAA <u>AT</u> ATATATATATATATATATATATATAATGT       | Dinucleotide repeat |
| HT-1  | Chr3:12575169 | -2 | TA | -  | Intergenic | TTATT <u>TA</u> TATATATATATATAAACAC                 | Dinucleotide repeat |
| HT-1  | Chr3:12691899 | 2  | -  | TA | Intergenic | TCTCT <u>ta</u> TATATATATATATAAGAGA                 | Dinucleotide repeat |
| HT-15 | Chr3:13483796 | 2  | -  | AT | Intergenic | ATATA <u>at</u> ATATATATATATATATGTTAT               | Dinucleotide repeat |
| HT-18 | Chr3:16925630 | -2 | TA | -  | Intergenic | AAGAT <u>TA</u> TATATATATATATATATATATATAATTAA       | Dinucleotide repeat |
| HT-15 | Chr3:18395159 | 2  | -  | AT | Intron     | TAAAT <u>at</u> ATATATATATATATATATATATATATATATCTTTG | Dinucleotide repeat |
| HT-1  | Chr3:18782079 | 2  | -  | AT | Intergenic | AAAGA <u>at</u> ATATATATATATTTCGT                   | Dinucleotide repeat |
| HT-15 | Chr3:20067393 | 2  | -  | CT | Intergenic | CCCTA <u>ct</u> CTCTCTCTCTCTCTCTCTCTCGCTA           | Dinucleotide repeat |
| HT-21 | Chr3:21676382 | -2 | TA | -  | Intergenic | CTCTC <u>TA</u> TATATATATATATATATCAAA               | Dinucleotide repeat |
| HT-11 | Chr3:21869819 | -2 | AT | -  | Intergenic | GTAGA <u>AT</u> ATATATATATATATATATATGTTAA           | Dinucleotide repeat |
| HT-11 | Chr3:6172463  | -2 | AT | -  | Intergenic | ATTTG <u>AT</u> ATATATATATATATATATCTATA             | Dinucleotide repeat |
| HT-20 | Chr3:7905919  | -2 | TA | -  | Intergenic | AATTG <u>TA</u> TATATATATATATAATGTT                 | Dinucleotide repeat |
| HT-20 | Chr3:832839   | 2  | -  | TA | Intergenic | CTATC <u>ta</u> TATATATATATATCTCC                   | Dinucleotide repeat |
| HT-20 | Chr3:8644732  | 2  | -  | AT | Intergenic | ATTTA <u>at</u> ATATATATATATATATATATACATT           | Dinucleotide repeat |
| HT-21 | Chr4:15394126 | -2 | AT | -  | UTR        | GAGAG <u>AT</u> ATATATATATATATAGAGA                 | Dinucleotide repeat |
| HT-18 | Chr4:17720802 | -2 | TA | -  | Intergenic | AGTTT <u>TA</u> TATATATATATATATATATAGAAAG           | Dinucleotide repeat |



|       |               |    |    |    |            |                                                  |                     |
|-------|---------------|----|----|----|------------|--------------------------------------------------|---------------------|
| HT-18 | Chr4:18453389 | -2 | AT | -  | Intergenic | CACAC <u>AT</u> ATATATATATATATATATATATACTCA      | Dinucleotide repeat |
| HT-21 | Chr4:2245472  | -2 | TA | -  | Intergenic | AACAT <u>TA</u> TATATATATATATTATT                | Dinucleotide repeat |
| HT-21 | Chr5:13111696 | -2 | TA | -  | Intergenic | TATAT <u>TA</u> TATATATATATATATAAAAAAG           | Dinucleotide repeat |
| HT-18 | Chr5:13863189 | -2 | AT | -  | Intergenic | AATCA <u>AT</u> ATATATATATATATATATATATATATTTAAAC | Dinucleotide repeat |
| HT-20 | Chr5:19701445 | -2 | TA | -  | Intergenic | ACAAT <u>TA</u> TATATATATATATATATATATTTTAT       | Dinucleotide repeat |
| HT-21 | Chr5:5165091  | -2 | TA | -  | Intergenic | TTAGG <u>TA</u> TATATATATATATATATAGTTAA          | Dinucleotide repeat |
| HT-21 | Chr5:5594780  | 2  | -  | CT | UTR        | TTTCC <u>ct</u> CTCTCTCTCTCTCTCTCTAG             | Dinucleotide repeat |
| HT-21 | Chr1:11339645 | -1 | A  | -  | Intron     | CTATT <u>AAAAAAAAAAAAAAAAAT</u> GAAA             | Homopolymeric       |
| HT-15 | Chr1:13126991 | -1 | A  | -  | Intergenic | TATCT <u>AAAAAAAAAT</u> CAAC                     | Homopolymeric       |
| HT-15 | Chr1:14606433 | -1 | A  | -  | Intergenic | GCCCT <u>AAAAAAAAAAAT</u> TGAC                   | Homopolymeric       |
| HT-1  | Chr1:16680566 | -1 | A  | -  | Intergenic | TACAC <u>AAAAAAAAAAAT</u> TGTGT                  | Homopolymeric       |
| HT-21 | Chr1:19526965 | -1 | A  | -  | Intergenic | AAAAG <u>AAAAAAAAAAAG</u> TAAA                   | Homopolymeric       |
| HT-15 | Chr1:20686277 | -1 | A  | -  | Intergenic | AAGAT <u>AAAAAAAAAAAG</u> AAGA                   | Homopolymeric       |
| HT-1  | Chr1:20699996 | -1 | T  | -  | Intergenic | TATCA <u>T</u> TTTTTTTTTTTTAGAAA                 | Homopolymeric       |
| HT-21 | Chr1:21206782 | -1 | T  | -  | Intergenic | ACACA <u>T</u> TTTTTTTTTTTTATGGA                 | Homopolymeric       |
| HT-11 | Chr1:22891358 | -1 | T  | -  | Intergenic | TCACA <u>T</u> TTTTTTTTTTTTGTTAA                 | Homopolymeric       |
| HT-1  | Chr1:23286686 | -1 | A  | -  | UTR        | CTCTG <u>AAAAAAAAAAAAAACT</u> TTG                | Homopolymeric       |
| HT-21 | Chr1:23690770 | -1 | T  | -  | UTR        | TGACC <u>T</u> TTTTTTTTTCTATA                    | Homopolymeric       |
| HT-15 | Chr1:25695984 | 2  | -  | TT | Intergenic | TTCTC <u>tt</u> TTTTTTTTTTTTATTTT                | Homopolymeric       |
| HT-15 | Chr1:26950761 | -1 | A  | -  | Intron     | TGCTT <u>AAAAAAAAAAAAAG</u> TATA                 | Homopolymeric       |
| HT-20 | Chr1:26977659 | -1 | T  | -  | Intron     | AGATC <u>T</u> TTTTTTTTTACGTC                    | Homopolymeric       |
| HT-21 | Chr1:27252098 | 1  | -  | A  | Intron     | AAAAG <u>a</u> AAAAAAAAAAAACAAGT                 | Homopolymeric       |
| HT-1  | Chr1:28209515 | -1 | A  | -  | UTR        | ACAAG <u>A</u> AAAAAAAAAAAAATTATA                | Homopolymeric       |
| HT-15 | Chr1:28297417 | -1 | T  | -  | Intron     | TTGGC <u>T</u> TTTTTTTTTAAATAA                   | Homopolymeric       |
| HT-11 | Chr1:28683950 | -1 | T  | -  | Intergenic | TTATC <u>T</u> TTTTTTTAGTTG                      | Homopolymeric       |

|       |               |    |    |   |            |                                         |               |
|-------|---------------|----|----|---|------------|-----------------------------------------|---------------|
| HT-21 | Chr1:29383045 | -1 | A  | - | Intergenic | GATGG <u>AAAAAAAAAAAA</u> ACTAAG        | Homopolymeric |
| HT-11 | Chr1:3381213  | -1 | T  | - | Intergenic | TTCAATTTTTTTTTTGTGTT                    | Homopolymeric |
| HT-20 | Chr1:3975532  | -1 | A  | - | Intergenic | CCATT <u>AAAAAAAAAAAA</u> ACAGGA        | Homopolymeric |
| HT-18 | Chr1:4076288  | -1 | A  | - | Intergenic | CCGTC <u>AAAAAAAAAAAA</u> CAATC         | Homopolymeric |
| HT-21 | Chr1:6512154  | -1 | A  | - | Intergenic | TAGAT <u>AAAAAAAAAAAA</u> AGGAAA        | Homopolymeric |
| HT-21 | Chr1:7333806  | -1 | A  | - | Intergenic | AAAAG <u>AAAAAAAAAAAA</u> ATTACC        | Homopolymeric |
| HT-20 | Chr1:8319580  | -1 | T  | - | Intergenic | GTTACTTTTTTTTTTGTGCGT                   | Homopolymeric |
| HT-1  | Chr1:9132314  | -1 | T  | - | Intergenic | TCACGTTTTTTTTTTAATAT                    | Homopolymeric |
| HT-1  | Chr1:9582862  | -1 | T  | - | Intergenic | AGTAA <u>TTTTTTTTTT</u> GTTAG           | Homopolymeric |
| HT-18 | Chr2:11728791 | 1  | -  | A | Intergenic | AAAAG <u>aAAAAAAAAA</u> GCAAA           | Homopolymeric |
| HT-1  | Chr2:12740680 | -1 | G  | - | Intergenic | ACTTAGGGGGGGGGGTATTG                    | Homopolymeric |
| HT-1  | Chr2:15963389 | -1 | T  | - | Intergenic | TCATA <u>TTTTTTTTTT</u> GATTA           | Homopolymeric |
| HT-1  | Chr2:16816144 | -1 | T  | - | Intergenic | ATTTGTTTTTTTTTTTTGTTTT                  | Homopolymeric |
| HT-20 | Chr2:169643   | -1 | A  | - | Intergenic | TTGAC <u>AAAAAAAAAAAA</u> AGCATT        | Homopolymeric |
| HT-1  | Chr2:17503175 | -1 | T  | - | Intergenic | TTTACTTTTTTTTTTGGGTA                    | Homopolymeric |
| HT-20 | Chr2:17670545 | 1  | -  | T | Intergenic | CACAG <u>tTTTTTTTTTT</u> TTTTTTTTTAAAGG | Homopolymeric |
| HT-1  | Chr2:17916933 | -1 | C  | - | Intron     | ATAC <u>CCCCCACTAA</u>                  | Homopolymeric |
| HT-1  | Chr2:2227013  | -2 | AA | - | Intergenic | TATAT <u>AAAATCT</u>                    | Homopolymeric |
| HT-20 | Chr2:4458123  | -1 | T  | - | Intergenic | TATTGTTTTTTTTTTTTTTTAACAC               | Homopolymeric |
| HT-21 | Chr2:5240832  | -1 | G  | - | TE         | TCCGTGGGGGGGGGTGGCA                     | Homopolymeric |
| HT-21 | Chr2:7084619  | -1 | T  | - | Intergenic | GTTACTTTTTTTTTTTTTTAGTCA                | Homopolymeric |
| HT-20 | Chr2:7422128  | -1 | A  | - | Intergenic | AAATT <u>AAAAAAAAAAAA</u> AGAGAG        | Homopolymeric |
| HT-21 | Chr2:8104061  | -1 | A  | - | Intergenic | GAAGG <u>AAAAAAAAAAAA</u> AGTGAT        | Homopolymeric |
| HT-1  | Chr2:8560007  | -1 | A  | - | Intergenic | AAGTT <u>AAAAAAAAAG</u> TAGA            | Homopolymeric |
| HT-21 | Chr2:8647449  | -1 | A  | - | Intergenic | CACAT <u>AAAAAAAAAAAA</u> GGTTA         | Homopolymeric |
| HT-20 | Chr2:8706400  | -1 | T  | - | Intron     | CAAAC <u>TTTTTTTTTT</u> TTAATTA         | Homopolymeric |
| HT-11 | Chr2:9919932  | -1 | A  | - | Intergenic | AAAAG <u>AAAAAAAAAAAA</u> CATAT         | Homopolymeric |
| HT-1  | Chr3:11004372 | 1  | -  | T | Intergenic | TTTT <u>CtTTTTTTTT</u> TAATAT           | Homopolymeric |

|       |               |     |               |   |            |                                             |               |
|-------|---------------|-----|---------------|---|------------|---------------------------------------------|---------------|
| HT-11 | Chr3:1664694  | -7  | AAAAAAA       | - | Intron     | AGGTGAAAAAAAAAAAAAAAAA <u>AAAAAAA</u> GTGAA | Homopolymeric |
| HT-21 | Chr3:16968246 | -1  | T             | - | Intergenic | TACAA <u>T</u> TTTTTTTTTTAATCT              | Homopolymeric |
| HT-1  | Chr3:16975618 | -1  | T             | - | Intergenic | ACTTA <u>T</u> TTTTTTTTTATTTA               | Homopolymeric |
| HT-18 | Chr3:17260053 | -1  | A             | - | Intergenic | AAAT <u>A</u> AAAAAAAAAAAAAAAAAGAGGA        | Homopolymeric |
| HT-21 | Chr3:18619801 | -1  | T             | - | Intergenic | TCTAA <u>T</u> TTTTTTTTTCTTTC               | Homopolymeric |
| HT-18 | Chr3:18950904 | -1  | T             | - | Intergenic | TAATA <u>T</u> TTTTTTTTTTTTGAGGA            | Homopolymeric |
| HT-20 | Chr3:19852394 | -1  | A             | - | Intergenic | CAAAC <u>A</u> AAAAAAAAAAATCAAA             | Homopolymeric |
| HT-11 | Chr3:20914031 | 1   | -             | A | Intergenic | AATGT <u>a</u> AAAAAAAAAACTCGA              | Homopolymeric |
| HT-20 | Chr3:21412423 | -1  | A             | - | Intergenic | AAAGG <u>A</u> AAAAAAAAAAACAATT             | Homopolymeric |
| HT-18 | Chr3:3253223  | -1  | A             | - | Intergenic | AAAAG <u>A</u> AAAAAAAAAAAGAAGA             | Homopolymeric |
| HT-15 | Chr3:5373167  | -1  | A             | - | Intergenic | TTTAT <u>A</u> AAAAAAAAAAATCAAA             | Homopolymeric |
| HT-20 | Chr3:6463425  | -1  | T             | - | Intergenic | ACAAC <u>T</u> TTTTTTTTTAGTTA               | Homopolymeric |
| HT-1  | Chr3:8824254  | 1   | -             | A | Intron     | TAAAG <u>a</u> AAAAAAAAACAGTT               | Homopolymeric |
| HT-18 | Chr4:10786560 | 1   | -             | A | Intergenic | GCAAT <u>a</u> AAAAAAAAAAAGTTCA             | Homopolymeric |
| HT-11 | Chr4:12985506 | -1  | A             | - | Intergenic | GAAAT <u>A</u> AAAAAAAAACTGAT               | Homopolymeric |
| HT-1  | Chr4:13148371 | -1  | T             | - | Intron     | ACACA <u>T</u> TTTTTTTAACTC                 | Homopolymeric |
| HT-21 | Chr4:13828476 | -14 | AAAAAAAAGAAAA | - | UTR        | AAAAA <u>AAAGAAAAAAAAA</u> GAGCT            | Homopolymeric |
| HT-15 | Chr4:1439209  | -1  | A             | - | Intergenic | ACAAT <u>A</u> AAAAAAAAAAATAATG             | Homopolymeric |
| HT-20 | Chr4:15698587 | -1  | A             | - | Intergenic | CAAAG <u>A</u> AAAAAAAAAAAGAGTA             | Homopolymeric |
| HT-20 | Chr4:16597704 | -1  | A             | - | Intergenic | CTAAG <u>A</u> AAAAAAAAACCCTC               | Homopolymeric |
| HT-21 | Chr4:17794647 | -1  | T             | - | Intergenic | TTGTA <u>T</u> TTTTTTTTTGTCTT               | Homopolymeric |
| HT-1  | Chr4:2659645  | -1  | T             | - | Intergenic | TTTTCTTTTTTTTTTCAATC                        | Homopolymeric |
| HT-15 | Chr4:2867176  | -1  | A             | - | Intergenic | TAGAG <u>A</u> AAAAAAAAATGCAT               | Homopolymeric |
| HT-21 | Chr4:3282646  | -1  | A             | - | Intergenic | AAAAC <u>A</u> AAAAAAAAAAATTGAA             | Homopolymeric |
| HT-15 | Chr4:5403159  | -1  | T             | - | Intergenic | ACTTA <u>T</u> TTTTTTTTTTTGTATT             | Homopolymeric |
| HT-15 | Chr4:9886010  | -1  | A             | - | Intergenic | AAAAG <u>A</u> AAAAAAAAAATATAT              | Homopolymeric |
| HT-11 | Chr4:9960777  | -1  | A             | - | Intergenic | GGATG <u>A</u> AAAAAAAAAAATAGAC             | Homopolymeric |
| HT-1  | Chr5:10391521 | -1  | T             | - | Intergenic | ATTACTTTTTTTTCATAT                          | Homopolymeric |



|       |               |   |   |   |            |  |  |
|-------|---------------|---|---|---|------------|--|--|
| HT-1  | Chr2:10442268 | 0 | A | T | Intergenic |  |  |
| HT-1  | Chr2:12002525 | 0 | A | C | Intergenic |  |  |
| HT-1  | Chr3:2611048  | 0 | G | C | Intron     |  |  |
| HT-1  | Chr3:12619911 | 0 | T | A | Intergenic |  |  |
| HT-1  | Chr3:21971906 | 0 | A | T | Intergenic |  |  |
| HT-1  | Chr4:3789271  | 0 | G | A | TE         |  |  |
| HT-1  | Chr4:4723209  | 0 | G | A | Intergenic |  |  |
| HT-1  | Chr4:5480807  | 0 | G | T | TE         |  |  |
| HT-1  | Chr5:8755519  | 0 | T | A | Intron     |  |  |
| HT-1  | Chr5:8770714  | 0 | G | A | Intergenic |  |  |
| HT-1  | Chr5:9460202  | 0 | G | A | Intergenic |  |  |
| HT-1  | Chr5:9931692  | 0 | G | A | Intergenic |  |  |
| HT-1  | Chr5:11126531 | 0 | C | T | Intergenic |  |  |
| HT-1  | Chr5:21915294 | 0 | G | A | Intergenic |  |  |
| HT-11 | Chr1:5759844  | 0 | G | A | Intron     |  |  |
| HT-11 | Chr1:8166201  | 0 | G | A | Intergenic |  |  |
| HT-11 | Chr1:11117631 | 0 | G | A | Intergenic |  |  |
| HT-11 | Chr1:13165211 | 0 | C | T | Intergenic |  |  |
| HT-11 | Chr1:15879385 | 0 | C | T | Intergenic |  |  |
| HT-11 | Chr2:715687   | 0 | G | A | Intergenic |  |  |
| HT-11 | Chr2:2639933  | 0 | C | G | TE         |  |  |
| HT-11 | Chr2:3721045  | 0 | A | G | Intergenic |  |  |
| HT-11 | Chr2:3994058  | 0 | C | T | Intergenic |  |  |
| HT-11 | Chr2:5510145  | 0 | C | T | TE         |  |  |
| HT-11 | Chr2:7171329  | 0 | C | T | TE         |  |  |
| HT-11 | Chr2:11373558 | 0 | G | A | Intergenic |  |  |
| HT-11 | Chr2:19454254 | 0 | T | A | CDS        |  |  |
| HT-11 | Chr3:7136342  | 0 | C | T | Intron     |  |  |

|       |               |   |   |   |            |  |  |
|-------|---------------|---|---|---|------------|--|--|
| HT-11 | Chr3:12862151 | 0 | A | C | TE         |  |  |
| HT-11 | Chr3:13596662 | 0 | G | C | Intergenic |  |  |
| HT-11 | Chr4:1507960  | 0 | C | T | Intergenic |  |  |
| HT-11 | Chr4:2101311  | 0 | C | T | Intergenic |  |  |
| HT-11 | Chr4:4512917  | 0 | A | C | TE         |  |  |
| HT-11 | Chr4:15261455 | 0 | C | T | Intergenic |  |  |
| HT-11 | Chr5:7300002  | 0 | C | A | Pseudogene |  |  |
| HT-11 | Chr5:19675362 | 0 | G | A | Intergenic |  |  |
| HT-11 | Chr5:26671119 | 0 | T | A | Intergenic |  |  |
| HT-15 | Chr1:9454252  | 0 | A | T | Intergenic |  |  |
| HT-15 | Chr1:11127336 | 0 | G | A | Intergenic |  |  |
| HT-15 | Chr1:12161374 | 0 | G | A | Intergenic |  |  |
| HT-15 | Chr1:13447138 | 0 | G | A | TE         |  |  |
| HT-15 | Chr1:15720647 | 0 | G | A | Pseudogene |  |  |
| HT-15 | Chr3:14534689 | 0 | C | G | Intergenic |  |  |
| HT-15 | Chr4:8319421  | 0 | C | T | Intergenic |  |  |
| HT-15 | Chr4:8942472  | 0 | G | A | Intergenic |  |  |
| HT-15 | Chr4:12484695 | 0 | G | A | Intergenic |  |  |
| HT-15 | Chr5:12981924 | 0 | G | A | Intron     |  |  |
| HT-15 | Chr5:14002473 | 0 | C | T | Intergenic |  |  |
| HT-15 | Chr5:25663357 | 0 | A | T | Intergenic |  |  |
| HT-18 | Chr1:5970757  | 0 | A | T | Intergenic |  |  |
| HT-18 | Chr1:17874078 | 0 | G | T | Intergenic |  |  |
| HT-18 | Chr1:21970368 | 0 | G | T | Intron     |  |  |
| HT-18 | Chr1:28843265 | 0 | G | T | Intergenic |  |  |
| HT-18 | Chr4:10400859 | 0 | C | T | Intergenic |  |  |
| HT-18 | Chr4:16988590 | 0 | G | C | CDS        |  |  |
| HT-18 | Chr5:14087316 | 0 | C | T | TE         |  |  |

|       |               |   |   |   |            |  |  |
|-------|---------------|---|---|---|------------|--|--|
| HT-18 | Chr5:19910144 | 0 | G | A | Intergenic |  |  |
| HT-18 | Chr5:20785553 | 0 | A | G | CDS        |  |  |
| HT-18 | Chr5:21837746 | 0 | A | G | Intergenic |  |  |
| HT-18 | Chr5:22534434 | 0 | C | T | Intergenic |  |  |
| HT-20 | Chr1:8042278  | 0 | A | T | Intergenic |  |  |
| HT-20 | Chr1:15538681 | 0 | G | A | Intergenic |  |  |
| HT-20 | Chr1:23872766 | 0 | A | G | CDS        |  |  |
| HT-20 | Chr2:10603285 | 0 | C | G | Intergenic |  |  |
| HT-20 | Chr3:11408296 | 0 | G | A | Intergenic |  |  |
| HT-20 | Chr4:3035490  | 0 | G | A | Intergenic |  |  |
| HT-20 | Chr4:3606221  | 0 | A | G | Intergenic |  |  |
| HT-20 | Chr4:5840966  | 0 | C | A | CDS        |  |  |
| HT-20 | Chr5:250133   | 0 | C | A | Intergenic |  |  |
| HT-20 | Chr5:24944428 | 0 | C | T | CDS        |  |  |
| HT-21 | Chr1:6900138  | 0 | T | C | Intergenic |  |  |
| HT-21 | Chr2:2471240  | 0 | A | G | Intergenic |  |  |
| HT-21 | Chr2:5334363  | 0 | T | G | TE         |  |  |
| HT-21 | Chr2:6718575  | 0 | A | C | TE         |  |  |
| HT-21 | Chr2:10690015 | 0 | C | T | CDS        |  |  |
| HT-21 | Chr2:12286260 | 0 | G | A | CDS        |  |  |
| HT-21 | Chr3:11187461 | 0 | G | A | TE         |  |  |
| HT-21 | Chr3:12718778 | 0 | G | A | TE         |  |  |
| HT-21 | Chr3:14397126 | 0 | A | G | Intergenic |  |  |
| HT-21 | Chr3:14718365 | 0 | G | A | TE         |  |  |
| HT-21 | Chr3:15478326 | 0 | G | C | Intergenic |  |  |
| HT-21 | Chr3:17451934 | 0 | T | C | Intron     |  |  |
| HT-21 | Chr4:4370464  | 0 | G | A | TE         |  |  |
| HT-21 | Chr4:4880703  | 0 | C | T | TE         |  |  |

|       |               |    |   |   |            |  |  |
|-------|---------------|----|---|---|------------|--|--|
| HT-21 | Chr5:8107226  | 0  | T | C | CDS        |  |  |
| HT-21 | Chr5:9712336  | 0  | G | A | TE         |  |  |
| CT-10 | Chr1:23761255 | 0  | A | G | Intergenic |  |  |
| CT-10 | Chr1:24306494 | -1 | T | - | Intergenic |  |  |
| CT-2  | Chr1:57619    | 0  | G | A | CDS        |  |  |
| CT-2  | Chr2:15883885 | -1 | A | - | UTR        |  |  |
| CT-2  | Chr2:8555726  | 0  | G | A | Intergenic |  |  |
| CT-2  | Chr5:23097639 | 0  | T | C | CDS        |  |  |
| CT-2  | Chr5:5707226  | 0  | G | A | Intron     |  |  |
| CT-4  | Chr2:13356157 | 0  | A | C | Intron     |  |  |
| CT-4  | Chr2:5586514  | 0  | C | A | Pseudogene |  |  |
| CT-4  | Chr3:17006305 | 0  | T | C | Intron     |  |  |
| CT-4  | Chr3:17465651 | 0  | T | G | CDS        |  |  |
| CT-4  | Chr4:3775263  | 0  | T | A | Intergenic |  |  |
| CT-4  | Chr5:19360667 | 0  | T | G | TE         |  |  |
| CT-6  | Chr1:13104509 | 0  | C | T | Intergenic |  |  |
| CT-6  | Chr3:13532744 | 0  | C | T | Intergenic |  |  |

**Supplemental Table 2.** Entire list of all detected HT- and CT-induced mutations. List shows each individual DNA sequence mutation identified in the six genome-sequenced G11 HT MA plants and five genome-sequenced G6 CT MA plants. \* The column titled “Flanking indel mutation sequence” shows deletions in red uppercase text and insertions in red lowercase text. Also shown in underlined text are the dinucleotide repeats, trinucleotide repeat, and homopolymeric sequences the indel mutations are associated with.



| Species    | Organism | Organism and genotype                        | Description          | Environmental temperature | Number of indel mutations reported | Number of SNV mutations reported | Indel/SNV ratio | Reference                   |
|------------|----------|----------------------------------------------|----------------------|---------------------------|------------------------------------|----------------------------------|-----------------|-----------------------------|
| EUBACTERIA | Bacteria | <i>Micrococcus sp. KBS0714</i>               | Wild type            | ST                        | 83                                 | 170                              | 0.488           | (Long et al. 2018)          |
| EUBACTERIA | Bacteria | <i>Kineococcus radiotolerans</i>             | Wild type            | ST                        | 122                                | 280                              | 0.436           | (Long et al. 2018)          |
| EUBACTERIA | Bacteria | <i>Bacillus subtilis</i>                     | Wild type            | ST                        | 29                                 | 69                               | 0.420           | (Sung et al. 2012)          |
| EUBACTERIA | Bacteria | <i>Deinococcus radiodurans</i>               | DNA repair-deficient | ST                        | 35                                 | 127                              | 0.276           | (Long et al. 2015)          |
| EUBACTERIA | Bacteria | <i>Vibrio fischeri ES114</i>                 | Wild type            | ST                        | 60                                 | 219                              | 0.274           | (Dillon et al. 2017)        |
| EUBACTERIA | Bacteria | <i>Escherichia coli</i>                      | Wild type            | ST                        | 20                                 | 73                               | 0.274           | (Shewaramani et al. 2017)   |
| EUBACTERIA | Bacteria | <i>Vibrio cholerae 2740-81</i>               | DNA repair defective | ST                        | 273                                | 1022                             | 0.267           | (Dillon et al. 2017)        |
| EUBACTERIA | Bacteria | <i>Mycobacterium smegmatis MC2 155</i>       | Wild type            | ST                        | 207                                | 856                              | 0.242           | (Kucukyildirim et al. 2016) |
| EUBACTERIA | Bacteria | <i>Escherichia coli</i>                      | Wild type            | ST                        | 17                                 | 74                               | 0.230           | (Shewaramani et al. 2017)   |
| EUBACTERIA | Bacteria | <i>Escherichia coli</i>                      | Wild type            | ST - 37°C                 | 342                                | 1636                             | 0.209           | (Chu et al. 2018)           |
| EUBACTERIA | Bacteria | <i>Escherichia coli</i>                      | Wild type            | CT - 28°C                 | 214                                | 1041                             | 0.206           | (Chu et al. 2018)           |
| EUBACTERIA | Bacteria | <i>Arthrobacter sp. KBS0703</i>              | Wild type            | ST                        | 88                                 | 451                              | 0.195           | (Long et al. 2018)          |
| EUBACTERIA | Bacteria | <i>Mesoplasma florum L1</i>                  | Wild type            | ST                        | 101                                | 527                              | 0.192           | (Sung et al. 2012)          |
| EUBACTERIA | Bacteria | <i>Ruegeria pomeroyi DSS-3</i>               | Wild type            | ST                        | 30                                 | 161                              | 0.186           | (Sun et al. 2017)           |
| EUBACTERIA | Bacteria | <i>Pseudomonas aeruginosa</i>                | Wild type            | ST                        | 8                                  | 44                               | 0.182           | (Dettman et al. 2016)       |
| EUBACTERIA | Bacteria | <i>Escherichia coli</i>                      | Wild type            | CT - 25°C                 | 191                                | 1108                             | 0.172           | (Chu et al. 2018)           |
| EUBACTERIA | Bacteria | <i>Vibrio cholerae 2740-80</i>               | Wild type            | ST                        | 22                                 | 138                              | 0.159           | (Dillon et al. 2017)        |
| EUBACTERIA | Bacteria | <i>Caulobacter crescentus NA1000</i>         | Wild type            | ST                        | 41                                 | 259                              | 0.158           | (Long et al. 2018)          |
| EUBACTERIA | Bacteria | <i>Pseudomonas aeruginosa</i>                | DNA repair defective | ST                        | 108                                | 690                              | 0.157           | (Dettman et al. 2016)       |
| EUBACTERIA | Bacteria | <i>Staphylococcus epidermidis ATCC 12228</i> | Wild type            | ST                        | 45                                 | 294                              | 0.153           | (Sung et al. 2016)          |
| EUBACTERIA | Bacteria | <i>Rhodobacter sphaeroides ATCC17025</i>     | Wild type            | ST                        | 16                                 | 107                              | 0.150           | (Long et al. 2018)          |
| EUBACTERIA | Bacteria | <i>Gemmata obscuriglobus DSM5831</i>         | Wild type            | ST                        | 29                                 | 197                              | 0.147           | (Long et al. 2018)          |
| EUBACTERIA | Bacteria | <i>Flavobacterium sp. KBS0721</i>            | Wild type            | ST                        | 85                                 | 580                              | 0.147           | (Long et al. 2018)          |
| EUBACTERIA | Bacteria | <i>Burkholderia cenocepacia HI2424</i>       | Wild type            | ST                        | 33                                 | 245                              | 0.135           | (Dillon et al. 2015)        |
| EUBACTERIA | Bacteria | <i>Escherichia coli - PFM35 uvrA</i>         | DNA repair defective | ST                        | 40                                 | 316                              | 0.127           | (Foster et al. 2015)        |
| EUBACTERIA | Bacteria | <i>Staphylococcus aureus ATCC 25923</i>      | Wild type            | ST                        | 33                                 | 274                              | 0.120           | (Long et al. 2018)          |

|                             |          |                                                            |                      |    |      |       |       |                        |
|-----------------------------|----------|------------------------------------------------------------|----------------------|----|------|-------|-------|------------------------|
| EUBACTERIA                  | Bacteria | <i>Agrobacterium tumefaciens</i>                           | Wild type            | ST | 50   | 425   | 0.118 | (Sung et al. 2016)     |
| EUBACTERIA                  | Bacteria | <i>Escherichia coli</i> - PFM40<br><i>alkA tagA</i>        | DNA repair defective | ST | 30   | 265   | 0.113 | (Foster et al. 2015)   |
| EUBACTERIA                  | Bacteria | <i>Escherichia coli</i>                                    | DNA repair defective | ST | 34   | 306   | 0.111 | (Lee et al. 2012)      |
| EUBACTERIA                  | Bacteria | <i>Colwellia psychrerythraea</i><br>34H                    | Wild type            | ST | 44   | 400   | 0.110 | (Long et al. 2018)     |
| EUBACTERIA                  | Bacteria | <i>Escherichia coli</i> - PFM133<br><i>umuDC dinB polB</i> | DNA repair defective | ST | 27   | 252   | 0.107 | (Foster et al. 2015)   |
| EUBACTERIA                  | Bacteria | <i>Escherichia coli</i> - PFM180<br><i>xthA nfo</i>        | DNA repair defective | ST | 36   | 339   | 0.106 | (Foster et al. 2015)   |
| EUBACTERIA                  | Bacteria | <i>Escherichia coli</i> - PFM2                             | Wild type            | ST | 24   | 246   | 0.098 | (Foster et al. 2015)   |
| EUBACTERIA                  | Bacteria | <i>Escherichia coli</i>                                    | Wild type            | ST | 9    | 93    | 0.097 | (Lee et al. 2012)      |
| EUBACTERIA                  | Bacteria | <i>Escherichia coli</i> - PFM88<br><i>ada ogt</i>          | DNA repair defective | ST | 24   | 250   | 0.096 | (Foster et al. 2015)   |
| EUBACTERIA                  | Bacteria | <i>Escherichia coli</i> - ED1a                             | Wild type            | ST | 37   | 407   | 0.091 | (Foster et al. 2015)   |
| EUBACTERIA                  | Bacteria | <i>Vibrio fischeri</i> ES115                               | DNA repair defective | ST | 382  | 4313  | 0.089 | (Dillon et al. 2017)   |
| EUBACTERIA                  | Bacteria | <i>Escherichia coli</i>                                    | Wild type            | ST | 12   | 140   | 0.086 | (Lee et al. 2012)      |
| EUBACTERIA                  | Bacteria | <i>Escherichia coli</i> - PFM101<br><i>umuDC dinB</i>      | DNA repair defective | ST | 23   | 269   | 0.086 | (Foster et al. 2015)   |
| EUBACTERIA                  | Bacteria | <i>Janthinobacterium lividum</i><br>KBS0711                | Wild type            | ST | 9    | 106   | 0.085 | (Long et al. 2018)     |
| EUBACTERIA                  | Bacteria | <i>Escherichia coli</i> - PFM91 <i>nfi</i>                 | DNA repair defective | ST | 25   | 335   | 0.075 | (Foster et al. 2015)   |
| EUBACTERIA                  | Bacteria | <i>Escherichia coli</i> - IA11                             | Wild type            | ST | 31   | 422   | 0.073 | (Foster et al. 2015)   |
| EUBACTERIA                  | Bacteria | <i>Pseudomonas fluorescens</i>                             | DNA repair defective | ST | 2201 | 31106 | 0.071 | (Long et al. 2014)     |
| EUBACTERIA                  | Bacteria | <i>Lactococcus lactis</i><br>DSMZ20481                     | Wild type            | ST | 56   | 813   | 0.069 | (Long et al. 2018)     |
| EUBACTERIA                  | Bacteria | <i>Deinococcus radiodurans</i>                             | Wild type            | ST | 19   | 388   | 0.049 | (Long et al. 2015)     |
| EUBACTERIA                  | Bacteria | <i>Escherichia coli</i> - PFM2m                            | Wild type            | ST | 13   | 277   | 0.047 | (Foster et al. 2015)   |
| EUBACTERIA                  | Bacteria | <i>Escherichia coli</i> - PFM22<br><i>nth nei</i>          | DNA repair defective | ST | 6    | 209   | 0.029 | (Foster et al. 2015)   |
| EUBACTERIA                  | Bacteria | <i>Escherichia coli</i> - PFM6<br><i>mutY</i>              | DNA repair defective | ST | 6    | 485   | 0.012 | (Foster et al. 2015)   |
| EUBACTERIA                  | Bacteria | <i>Escherichia coli</i> - PFM94<br><i>mutM mutY</i>        | DNA repair defective | ST | 6    | 4282  | 0.001 | (Foster et al. 2015)   |
| EUBACTERIA                  | Bacteria | <i>Escherichia coli</i> - PFM61<br><i>mutT</i>             | DNA repair defective | ST | 1    | 2234  | 0.000 | (Foster et al. 2015)   |
| MULTICELLULAR<br>EUKARYOTES | Plant    | <i>Arabiposis thaliana</i>                                 | Wild type            | HT | 138  | 92    | 1.500 | This study             |
| MULTICELLULAR<br>EUKARYOTES | Plant    | <i>Arabiposis thaliana</i> -<br><i>Atmsh2-1</i>            | DNA repair defective | ST | 4663 | 4048  | 1.152 | (Belfield et al. 2018) |

|                          |                    |                                                                 |                                               |    |        |         |       |                              |
|--------------------------|--------------------|-----------------------------------------------------------------|-----------------------------------------------|----|--------|---------|-------|------------------------------|
| MULTICELLULAR EUKARYOTES | Fly                | <i>Chironomus riparius</i>                                      | Wild type                                     | ST | 25     | 26      | 0.962 | (Oppold and Pfenninger 2017) |
| MULTICELLULAR EUKARYOTES | Plant              | <i>Arabiposis thaliana</i>                                      | Fast-neutron irradiated wild type             | ST | 44     | 64      | 0.688 | (Belfield et al. 2012)       |
| MULTICELLULAR EUKARYOTES | Plant              | <i>Arabiposis thaliana</i>                                      | Wild type                                     | ST | 30     | 72      | 0.417 | (Jiang et al. 2014)          |
| MULTICELLULAR EUKARYOTES | Honey bee          | <i>Apis mellifera</i>                                           | Wild type                                     | ST | 8      | 27      | 0.296 | (Yang et al. 2015)           |
| MULTICELLULAR EUKARYOTES | Plant              | <i>Oryza sativa</i>                                             | Wild type                                     | ST | 14     | 51      | 0.275 | (Yang et al. 2015)           |
| MULTICELLULAR EUKARYOTES | Plant              | <i>Prunus interspecific crosses (P. davidiana × P. persica)</i> | Wild type                                     | ST | 28     | 144     | 0.194 | (Xie et al. 2016)            |
| MULTICELLULAR EUKARYOTES | Plant              | <i>Prunus intraspecific crosses (P. persica and P. mira)</i>    | Wild type                                     | ST | 18     | 96      | 0.188 | (Xie et al. 2016)            |
| MULTICELLULAR EUKARYOTES | Plant              | <i>Arabiposis thaliana</i>                                      | Wild type                                     | ST | 17     | 99      | 0.172 | (Ossowski et al. 2010)       |
| MULTICELLULAR EUKARYOTES | Plant              | <i>Arabiposis thaliana</i>                                      | Wild type                                     | ST | 7      | 44      | 0.159 | (Jiang et al. 2014)          |
| MULTICELLULAR EUKARYOTES | Fly                | <i>Drosophila melanogaster</i>                                  | Wild type                                     | ST | 188    | 1203    | 0.156 | (Huang et al. 2016)          |
| MULTICELLULAR EUKARYOTES | Nematode           | <i>Caenorhabditis elegans - N2</i>                              | Wild type                                     | ST | 7      | 60      | 0.117 | (Meier et al. 2014)          |
| MULTICELLULAR EUKARYOTES | Mouse              | <i>Mus musculus</i>                                             | Wild type                                     | ST | 7      | 63      | 0.106 | (Uchimura et al. 2015)       |
| MULTICELLULAR EUKARYOTES | Water flea         | <i>Daphnia pulex - ASEX</i>                                     | Wild type                                     | ST | 58     | 569     | 0.102 | (Keith et al. 2016)          |
| MULTICELLULAR EUKARYOTES | Bumblebee          | <i>Bombus terrestris</i>                                        | Wild type                                     | ST | 2      | 23      | 0.087 | (Liu et al. 2017)            |
| MULTICELLULAR EUKARYOTES | Fly                | <i>Drosophila melanogaster</i>                                  | Wild type                                     | ST | 60     | 732     | 0.082 | (Schridder et al. 2013)      |
| MULTICELLULAR EUKARYOTES | Human              | <i>Homo sapiens</i>                                             | Wild type                                     | ST | 1282   | 17812   | 0.072 | (Besenbacher et al. 2016)    |
| MULTICELLULAR EUKARYOTES | Fly                | <i>Drosophila melanogaster</i>                                  | Wild type                                     | ST | 49     | 786     | 0.062 | (Sharp and Agrawal 2016)     |
| MULTICELLULAR EUKARYOTES | Western chimpanzee | <i>Pan troglodytes verus</i>                                    | Wild type                                     | ST | 169387 | 3957360 | 0.043 | (Venn et al. 2014)           |
| MULTICELLULAR EUKARYOTES | Fly                | <i>Drosophila melanogaster</i>                                  | Wild type                                     | ST | 7      | 174     | 0.040 | (Keightley et al. 2009)      |
| MULTICELLULAR EUKARYOTES | Mouse              | <i>Mus musculus</i>                                             | Wild type                                     | ST | 4      | 118     | 0.034 | (Uchimura et al. 2015)       |
| MULTICELLULAR EUKARYOTES | Fly                | <i>Drosophila melanogaster</i>                                  | Wild type                                     | ST | 22     | 732     | 0.030 | (Schridder et al. 2013)      |
| MULTICELLULAR EUKARYOTES | Water flea         | <i>Daphnia pulex - CYC</i>                                      | Wild type                                     | ST | 4      | 164     | 0.024 | (Keith et al. 2016)          |
| MULTICELLULAR EUKARYOTES | Mouse              | <i>Mus musculus</i>                                             | Mutator <i>Pold1<sup>exo/exo</sup></i> line C | ST | 28     | 1304    | 0.021 | (Uchimura et al. 2015)       |

|                          |                    |                                                      |                                               |    |     |      |                    |                           |
|--------------------------|--------------------|------------------------------------------------------|-----------------------------------------------|----|-----|------|--------------------|---------------------------|
| MULTICELLULAR EUKARYOTES | Mouse              | <i>Mus musculus</i>                                  | Mutator <i>Pold1<sup>exo/exo</sup></i> line D | ST | 21  | 1472 | 0.014              | (Uchimura et al. 2015)    |
| MULTICELLULAR EUKARYOTES | Water flea         | <i>Daphnia pulex</i>                                 | Wild type                                     | ST | 6   | 477  | 0.013              | (Flynn et al. 2017)       |
| MULTICELLULAR EUKARYOTES | Butterfly          | <i>Heliconius melpomene</i>                          | Wild type                                     | ST | 0   | 9    | 0.000              | (Keightley et al. 2015)   |
| UNICELLULAR EUKARYOTES   | Protozoan parasite | <i>Plasmodium falciparum</i> - 3D7                   | Wild type                                     | ST | 164 | 15   | 10.93 <sub>3</sub> | (Hamilton et al. 2017)    |
| UNICELLULAR EUKARYOTES   | Yeast              | <i>Saccharomyces cerevisiae</i> - <i>rad27Δ</i>      | DNA replication defective                     | ST | 220 | 175  | 1.257              | (Serero et al. 2014)      |
| UNICELLULAR EUKARYOTES   | Fission Yeast      | <i>Schizosaccharomyces pombe</i>                     | Wild type                                     | ST | 335 | 344  | 0.974              | (Behringer and Hall 2015) |
| UNICELLULAR EUKARYOTES   | Yeast              | <i>Saccharomyces cerevisiae</i> - <i>msh2Δ</i>       | DNA repair defective                          | ST | 706 | 965  | 0.732              | (Serero et al. 2014)      |
| UNICELLULAR EUKARYOTES   | Green algae        | <i>Chlamydomonas reinhardtii</i>                     | Wild type                                     | ST | 13  | 20   | 0.650              | (Sung et al. 2012)        |
| UNICELLULAR EUKARYOTES   | Algae              | <i>Bathycoccus prasinos</i>                          | Wild type                                     | ST | 10  | 22   | 0.455              | (Krasovec et al. 2017)    |
| UNICELLULAR EUKARYOTES   | Yeast              | <i>Saccharomyces cerevisiae</i>                      | Wild type                                     | ST | 95  | 279  | 0.341              | (Liu and Zhang 2019)      |
| UNICELLULAR EUKARYOTES   | Green algae        | <i>Chlamydomonas reinhardtii</i> - CC-2391           | Mutator strain                                | ST | 405 | 1215 | 0.333              | (Ness et al. 2015)        |
| UNICELLULAR EUKARYOTES   | Green algae        | <i>Chlamydomonas reinhardtii</i> - CC-2937           | Wild type                                     | ST | 149 | 508  | 0.293              | (Ness et al. 2015)        |
| UNICELLULAR EUKARYOTES   | Fission Yeast      | <i>Schizosaccharomyces pombe</i>                     | Wild type                                     | ST | 119 | 422  | 0.282              | (Farlow et al. 2015)      |
| UNICELLULAR EUKARYOTES   | Yeast              | <i>Saccharomyces cerevisiae</i> - <i>mec1Δ tel1Δ</i> | DNA repair and replication defective          | ST | 6   | 24   | 0.250              | (Serero et al. 2014)      |
| UNICELLULAR EUKARYOTES   | Ichthyosporean     | <i>Sphaeroforma arctica</i> JP610                    | Wild type                                     | ST | 79  | 323  | 0.245              | (Long et al. 2018)        |
| UNICELLULAR EUKARYOTES   | Algae              | <i>Ostreococcus mediterraneus</i>                    | Wild type                                     | ST | 11  | 54   | 0.204              | (Krasovec et al. 2017)    |
| UNICELLULAR EUKARYOTES   | Algae              | <i>Micromonas pusilla</i>                            | Wild type                                     | ST | 14  | 71   | 0.197              | (Krasovec et al. 2017)    |
| UNICELLULAR EUKARYOTES   | Green algae        | <i>Chlamydomonas reinhardtii</i> - CC-2344           | Mutator strain                                | ST | 181 | 946  | 0.191              | (Ness et al. 2015)        |
| UNICELLULAR EUKARYOTES   | Yeast              | <i>Saccharomyces cerevisiae</i>                      | Wild type                                     | ST | 76  | 403  | 0.189              | (Liu and Zhang 2019)      |
| UNICELLULAR EUKARYOTES   | Green algae        | <i>Chlamydomonas reinhardtii</i> - CC-1952           | Wild type                                     | ST | 66  | 366  | 0.180              | (Ness et al. 2015)        |
| UNICELLULAR EUKARYOTES   | Protozoa           | <i>Paramecium tetraurelia</i>                        | Wild type                                     | ST | 5   | 29   | 0.172              | (Sung et al. 2012)        |
| UNICELLULAR EUKARYOTES   | Yeast              | <i>Saccharomyces cerevisiae</i> - <i>pol32Δ</i>      | DNA replication defective                     | ST | 8   | 47   | 0.170              | (Serero et al. 2014)      |
| UNICELLULAR EUKARYOTES   | Yeast              | <i>Saccharomyces cerevisiae</i>                      | Wild type                                     | ST | 21  | 125  | 0.168              | (Liu and Zhang 2019)      |

|                        |             |                                                      |                                                                   |              |     |      |       |                        |
|------------------------|-------------|------------------------------------------------------|-------------------------------------------------------------------|--------------|-----|------|-------|------------------------|
| UNICELLULAR EUKARYOTES | Yeast       | <i>Saccharomyces cerevisiae</i>                      | Wild type                                                         | ST           | 20  | 132  | 0.152 | (Liu and Zhang 2019)   |
| UNICELLULAR EUKARYOTES | Yeast       | <i>Saccharomyces cerevisiae</i>                      | Wild type                                                         | HT - 37-42°C | 18  | 123  | 0.146 | (Huang et al. 2018)    |
| UNICELLULAR EUKARYOTES | Algae       | <i>Ostreococcus tauri</i>                            | Wild type                                                         | ST           | 13  | 91   | 0.143 | (Krasovec et al. 2017) |
| UNICELLULAR EUKARYOTES | Green algae | <i>Chlamydomonas reinhardtii</i> - CC-1373           | Wild type                                                         | ST           | 222 | 1696 | 0.131 | (Ness et al. 2015)     |
| UNICELLULAR EUKARYOTES | Yeast       | <i>Rhodotorula toruloides</i> ATCC10788              | Wild type                                                         | ST           | 83  | 714  | 0.116 | (Long et al. 2016)     |
| UNICELLULAR EUKARYOTES | Yeast       | <i>Saccharomyces cerevisiae</i>                      | Wild type                                                         | ST           | 19  | 166  | 0.114 | (Liu and Zhang 2019)   |
| UNICELLULAR EUKARYOTES | Yeast       | <i>Saccharomyces cerevisiae</i> - <i>mre11Δ</i>      | DNA recombination defective                                       | ST           | 5   | 49   | 0.102 | (Serero et al. 2014)   |
| UNICELLULAR EUKARYOTES | Yeast       | <i>Saccharomyces cerevisiae</i>                      | Wild type                                                         | ST           | 11  | 112  | 0.098 | (Liu and Zhang 2019)   |
| UNICELLULAR EUKARYOTES | Green algae | <i>Chlamydomonas reinhardtii</i> - CC-2342           | Wild type                                                         | ST           | 73  | 824  | 0.089 | (Ness et al. 2015)     |
| UNICELLULAR EUKARYOTES | Yeast       | <i>Saccharomyces cerevisiae</i>                      | Wild type                                                         | ST           | 17  | 198  | 0.086 | (Liu and Zhang 2019)   |
| UNICELLULAR EUKARYOTES | Yeast       | <i>Saccharomyces cerevisiae</i> - WT                 | Diploid                                                           | ST           | 83  | 1183 | 0.070 | (Sharp et al. 2018)    |
| UNICELLULAR EUKARYOTES | Yeast       | <i>Saccharomyces cerevisiae</i> - <i>clb5Δ</i>       | Cell cycle defective                                              | ST           | 7   | 156  | 0.045 | (Serero et al. 2014)   |
| UNICELLULAR EUKARYOTES | Yeast       | <i>Saccharomyces cerevisiae</i> - WT                 | Haploid                                                           | ST           | 29  | 716  | 0.041 | (Sharp et al. 2018)    |
| UNICELLULAR EUKARYOTES | Yeast       | <i>Saccharomyces cerevisiae</i> - <i>pif1Δ</i>       | Maintenance of mitochondrial genome and telomere length defective | ST           | 3   | 75   | 0.040 | (Serero et al. 2014)   |
| UNICELLULAR EUKARYOTES | Yeast       | <i>Saccharomyces cerevisiae</i> - <i>tsa1Δ</i>       | Oxidative stress defective                                        | ST           | 19  | 512  | 0.037 | (Serero et al. 2014)   |
| UNICELLULAR EUKARYOTES | Diatom      | <i>Phaeodactylum tricornutum</i>                     | Wild type                                                         | ST           | 5   | 146  | 0.034 | (Krasovec et al. 2019) |
| UNICELLULAR EUKARYOTES | Yeast       | <i>Saccharomyces cerevisiae</i>                      | Wild type                                                         | ST           | 1   | 33   | 0.030 | (Lynch et al. 2008)    |
| UNICELLULAR EUKARYOTES | Yeast       | <i>Saccharomyces cerevisiae</i>                      | Wild type                                                         | ST           | 26  | 873  | 0.030 | (Zhu et al. 2014)      |
| UNICELLULAR EUKARYOTES | Yeast       | <i>Saccharomyces cerevisiae</i>                      | Wild type                                                         | ST           | 0   | 29   | 0.000 | (Nishant et al. 2010)  |
| UNICELLULAR EUKARYOTES | Yeast       | <i>Saccharomyces cerevisiae</i> - <i>cac1Δ cac3Δ</i> | Nucleosome deposition defective                                   | ST           | 0   | 40   | 0.000 | (Serero et al. 2014)   |
| UNICELLULAR EUKARYOTES | Yeast       | <i>Saccharomyces cerevisiae</i>                      | Wild type                                                         | ST           | 0   | 41   | 0.000 | (Serero et al. 2014)   |

**Supplemental Table 3.** Details of indel/SNV-ratio datasets used for Fig. 5C.

**A**

|              | Number of ST MNase-sequenced bases in nucleosomic categories |                    |                   |                    |
|--------------|--------------------------------------------------------------|--------------------|-------------------|--------------------|
| Chromosome   | Nucleosome                                                   | Edge-of-nucleosome | Non-nucleosome    | Total              |
| Chr1         | 12,725,320                                                   | 5,527,610          | 12,174,741        | 30,427,671         |
| Chr2         | 8,421,820                                                    | 3,643,330          | 7,633,139         | 19,698,289         |
| Chr3         | 10,066,850                                                   | 4,370,270          | 9,022,710         | 23,459,830         |
| Chr4         | 7,975,490                                                    | 3,454,000          | 7,155,566         | 18,585,056         |
| Chr5         | 11,453,920                                                   | 4,990,800          | 10,530,782        | 26,975,502         |
| <b>Total</b> | <b>50,643,400</b>                                            | <b>21,986,010</b>  | <b>46,516,938</b> | <b>119,146,348</b> |
| Percentage   | 42.5%                                                        | 18.5%              | 39.0%             | 100%               |
| Percentage   | 61.0%                                                        |                    | 39.0%             | 100%               |

**B**

|              | Number of HT MNase-sequenced bases in nucleosomic categories |                    |                   |                    |
|--------------|--------------------------------------------------------------|--------------------|-------------------|--------------------|
| Chromosome   | Nucleosome                                                   | Edge-of-nucleosome | Non-nucleosome    | Total              |
| Chr1         | 12,919,480                                                   | 5,437,410          | 12,070,781        | 30,427,671         |
| Chr2         | 8,549,770                                                    | 3,582,010          | 7,566,509         | 19,698,289         |
| Chr3         | 10,221,150                                                   | 4,295,670          | 8,943,010         | 23,459,830         |
| Chr4         | 8,086,600                                                    | 3,391,510          | 7,106,946         | 18,585,056         |
| Chr5         | 11,636,520                                                   | 4,895,280          | 10,443,702        | 26,975,502         |
| <b>Total</b> | <b>51,413,520</b>                                            | <b>21,601,880</b>  | <b>46,130,948</b> | <b>119,146,348</b> |
| Percentage   | 43.2%                                                        | 18.1%              | 38.7%             | 100%               |
| Percentage   | 61.3%                                                        |                    | 38.7%             | 100%               |

**Supplemental Table 4.** MNase-digested genomic DNA WGS data summary. MNase-digested genomic DNA extracted from plants grown at ST (A) and HT (B) was aligned to the TAIR10 reference using the improved nucleosome-positioning algorithm (iNPS (Chen et al. 2014)) to determine nucleosome occupancy profiles. Number of bases reported in nucleosome, edge-of-nucleosome and non-nucleosome regions in the genomes of plants are listed for Chromosomes 1–5. Also shown are the percentages of bases in nucleosomal, edge-of-nucleosome and non-nucleosomal categories, as well as the result of combining mutations located in nucleosome and edge-of-nucleosome regions into a single nucleosome-associated category.

**A**

| Mutation     | ST mutation count | ST mutation nucleosome category | Observed % of mutations in nucleosome category | Predicted % of mutations in nucleosome category |
|--------------|-------------------|---------------------------------|------------------------------------------------|-------------------------------------------------|
| Indel        | 8                 | Nucleosome                      | 44.4%                                          | 42.5%                                           |
|              | 4                 | Edge-of-nucleosome              | 22.2%                                          | 18.5%                                           |
|              | 6                 | Non-nucleosome                  | 33.3%                                          | 39.0%                                           |
| <b>Total</b> | <b>18</b>         |                                 | <b>100%</b>                                    | <b>100%</b>                                     |
|              |                   |                                 |                                                |                                                 |
| SNV          | 68                | Nucleosome                      | 47.6%                                          | 42.5%                                           |
|              | 24                | Edge-of-nucleosome              | 16.8%                                          | 18.5%                                           |
|              | 51                | Non-nucleosome                  | 35.7%                                          | 39.0%                                           |
| <b>Total</b> | <b>143</b>        |                                 | <b>100%</b>                                    | <b>100%</b>                                     |

**B**

| Mutation     | ST mutation count | ST mutation nucleosome category | Observed % of mutations in nucleosome category | Predicted % of mutations in nucleosome category |
|--------------|-------------------|---------------------------------|------------------------------------------------|-------------------------------------------------|
| Indel        | 12                | Nucleosome-associated           | 66.7%                                          | 61.0%                                           |
|              | 6                 | Non-nucleosome                  | 33.3%                                          | 39.0%                                           |
| <b>Total</b> | <b>18</b>         |                                 | <b>100%</b>                                    | <b>100%</b>                                     |
|              |                   |                                 |                                                |                                                 |
| SNV          | 92                | Nucleosome-associated           | 64.3%                                          | 61.0%                                           |
|              | 51                | Non-nucleosome                  | 35.7%                                          | 39.0%                                           |
| <b>Total</b> | <b>143</b>        |                                 | <b>100%</b>                                    | <b>100%</b>                                     |

**C**

| Mutation     | HT mutation count | HT mutation nucleosome category | Observed % of mutations in nucleosome category | Predicted % of mutations in nucleosome category |
|--------------|-------------------|---------------------------------|------------------------------------------------|-------------------------------------------------|
| Indel        | 35                | Nucleosome                      | 26.5%                                          | 43.2%                                           |
|              | 18                | Edge-of-nucleosome              | 13.6%                                          | 18.1%                                           |
|              | 79                | Non-nucleosome                  | 59.8%                                          | 38.7%                                           |
| <b>Total</b> | <b>132</b>        |                                 | <b>100%</b>                                    | <b>100%</b>                                     |
|              |                   |                                 |                                                |                                                 |
| SNV          | 43                | Nucleosome                      | 46.7%                                          | 43.2%                                           |
|              | 18                | Edge-of-nucleosome              | 19.6%                                          | 18.1%                                           |
|              | 31                | Non-nucleosome                  | 33.7%                                          | 38.7%                                           |
| <b>Total</b> | <b>92</b>         |                                 | <b>100%</b>                                    | <b>100%</b>                                     |

**D**

| Mutation     | HT mutation count | HT mutation nucleosome category | Observed % of mutations in nucleosome category | Predicted % of mutations in nucleosome category |
|--------------|-------------------|---------------------------------|------------------------------------------------|-------------------------------------------------|
| Indel        | 53                | Nucleosome-associated           | 40.2%                                          | 61.3%                                           |
|              | 79                | Non-nucleosome                  | 59.8%                                          | 38.7%                                           |
| <b>Total</b> | <b>132</b>        |                                 | <b>100%</b>                                    | <b>100%</b>                                     |
|              |                   |                                 |                                                |                                                 |
| SNV          | 61                | Nucleosome-associated           | 66.3%                                          | 61.3%                                           |
|              | 31                | Non-nucleosome                  | 33.7%                                          | 38.7%                                           |
| <b>Total</b> | <b>92</b>         |                                 | <b>100%</b>                                    | <b>100%</b>                                     |

**Supplemental Table 5.** Frequencies of indel and SNV mutations in different nucleosome categories. HT-induced (Supplemental Table 2) and ST (Ossowski et al. 2010; Jiang et al. 2014) mutations were overlaid onto the HT and ST MNase-seq nucleosome DNA profiles generated with iNPS (Chen et al. 2014) (see Methods and Supplemental Fig. 6). Shown are the observed genome-wide frequencies of ST indel and SNV mutations in different categories, versus the predicted (random distribution) expectation frequencies (see Supplemental Table 4A) in nucleosome, edge of nucleosome, and non-nucleosome regions (A). (B) Combined ST mutations located in nucleosome and edge-of-nucleosome regions shown as a single nucleosome-associated category (see Supplemental Table 4A). (C) and (D) Analyses of HT-induced indel and SNV mutations (as in (A) and (B), see Supplemental Table 4B predicted (random distribution) expectation frequencies).



## References

- Behringer MG, Hall DW. 2015. Genome-wide estimates of mutation rates and spectrum in *Schizosaccharomyces pombe* indicate CpG sites are highly mutagenic despite the absence of DNA methylation. *G3 (Bethesda)* **6**: 149-160.
- Belfield EJ, Ding ZJ, Jamieson FJC, Visscher AM, Zheng SJ, Mithani A, Harberd NP. 2018. DNA mismatch repair preferentially protects genes from mutation. *Genome Res* **28**: 66-74.
- Belfield EJ, Gan X, Mithani A, Brown C, Jiang C, Franklin K, Alvey E, Wibowo A, Jung M, Bailey K et al. 2012. Genome-wide analysis of mutations in mutant lineages selected following fast-neutron irradiation mutagenesis of *Arabidopsis thaliana*. *Genome Res* **22**: 1306-1315.
- Besenbacher S, Sulem P, Helgason A, Helgason H, Kristjansson H, Jonasdottir A, Jonasdottir A, Magnusson OT, Thorsteinsdottir U, Masson G et al. 2016. Multi-nucleotide *de novo* mutations in humans. *PLoS Genet* **12**: e1006315.
- Chen W, Liu Y, Zhu S, Green CD, Wei G, Han J-DJ. 2014. Improved nucleosome-positioning algorithm iNPS for accurate nucleosome positioning from sequencing data. *Nat Commun* **5**: 4909.
- Chu XL, Zhang BW, Zhang QG, Zhu BR, Lin K, Zhang DY. 2018. Temperature responses of mutation rate and mutational spectrum in an *Escherichia coli* strain and the correlation with metabolic rate. *BMC Evol Biol* **18**: 126.
- Crooks GE, Hon G, Chandonia JM, Brenner SE. 2004. WebLogo: a sequence logo generator. *Genome Res* **14**: 1188-1190.
- Dettman JR, Sztapanacz JL, Kassen R. 2016. The properties of spontaneous mutations in the opportunistic pathogen *Pseudomonas aeruginosa*. *BMC Genomics* **17**: 27.
- Dillon MM, Sung W, Lynch M, Cooper VS. 2015. The rate and molecular spectrum of spontaneous mutations in the GC-rich multichromosome genome of *Burkholderia cenocepacia*. *Genetics* **200**: 935-946.
- Dillon MM, Sung W, Sebra R, Lynch M, Cooper VS. 2017. Genome-wide biases in the rate and molecular spectrum of spontaneous mutations in *Vibrio cholerae* and *Vibrio fischeri*. *Mol Biol Evol* **34**: 93-109.
- Farlow A, Long H, Arnoux S, Sung W, Doak TG, Nordborg M, Lynch M. 2015. The spontaneous mutation rate in the fission yeast *Schizosaccharomyces pombe*. *Genetics* **201**: 737-744.
- Flynn JM, Chain FJ, Schoen DJ, Cristescu ME. 2017. Spontaneous mutation accumulation in *Daphnia pulex* in selection-free vs. competitive environments. *Mol Biol Evol* **34**: 160-173.
- Foster PL, Lee H, Popodi E, Townes JP, Tang H. 2015. Determinants of spontaneous mutation in the bacterium *Escherichia coli* as revealed by whole-genome sequencing. *Proc Natl Acad Sci USA* **112**: E5990-5999.
- Hamilton WL, Claessens A, Otto TD, Kekre M, Fairhurst RM, Rayner JC, Kwiatkowski D. 2017. Extreme mutation bias and high AT content in *Plasmodium falciparum*. *Nucleic Acids Res* **45**: 1889-1901.
- Huang CJ, Lu MY, Chang YW, Li WH. 2018. Experimental evolution of yeast for high-temperature tolerance. *Mol Biol Evol* **35**: 1823-1839.
- Huang W, Lyman RF, Lyman RA, Carbone MA, Harbison ST, Magwire MM, Mackay TF. 2016. Spontaneous mutations and the origin and maintenance of quantitative genetic variation. *eLife* **5**.
- Jiang C, Mithani A, Belfield EJ, Mott R, Hurst LD, Harberd NP. 2014. Environmentally responsive genome-wide accumulation of *de novo Arabidopsis thaliana* mutations and epimutations. *Genome Res* **24**: 1821-1829.
- Keightley PD, Pinharanda A, Ness RW, Simpson F, Dasmahapatra KK, Mallet J, Davey JW, Jiggins CD. 2015. Estimation of the spontaneous mutation rate in *Heliconius melpomene*. *Mol Biol Evol* **32**: 239-243.
- Keightley PD, Trivedi U, Thomson M, Oliver F, Kumar S, Blaxter ML. 2009. Analysis of the genome sequences of three *Drosophila melanogaster* spontaneous mutation accumulation lines. *Genome Res* **19**: 1195-1201.

- Keith N, Tucker AE, Jackson CE, Sung W, Lucas Lledo JI, Schrider DR, Schaack S, Dudycha JL, Ackerman M, Younge AJ et al. 2016. High mutational rates of large-scale duplication and deletion in *Daphnia pulex*. *Genome Res* **26**: 60-69.
- Krasovec M, Eyre-Walker A, Sanchez-Ferandin S, Piganeau G. 2017. Spontaneous mutation rate in the smallest photosynthetic eukaryotes. *Mol Biol Evol* **34**: 1770-1779.
- Krasovec M, Sanchez-Brosseau S, Piganeau G. 2019. First estimation of the spontaneous mutation rate in diatoms. *Genome Biol Evol* **11**: 1829-1837.
- Kucukyildirim S, Long H, Sung W, Miller SF, Doak TG, Lynch M. 2016. The rate and spectrum of spontaneous mutations in *Mycobacterium smegmatis*, a bacterium naturally devoid of the postreplicative mismatch repair pathway. *G3 (Bethesda)* **6**: 2157-2163.
- Lee H, Popodi E, Tang H, Foster PL. 2012. Rate and molecular spectrum of spontaneous mutations in the bacterium *Escherichia coli* as determined by whole-genome sequencing. *Proc Natl Acad Sci USA* **109**: E2774-2783.
- Liu H, Jia Y, Sun X, Tian D, Hurst LD, Yang S. 2017. Direct determination of the mutation rate in the bumblebee reveals evidence for weak recombination-associated mutation and an approximate rate constancy in insects. *Mol Biol Evol* **34**: 119-130.
- Liu H, Zhang J. 2019. Yeast spontaneous mutation rate and spectrum vary with environment. *Curr Biol* **29**: 1584-1591 e1583.
- Long H, Behringer MG, Williams E, Te R, Lynch M. 2016. Similar mutation rates but highly diverse mutation spectra in ascomycete and basidiomycete yeasts. *Genome Biol Evol* **8**: 3815-3821.
- Long H, Kucukyildirim S, Sung W, Williams E, Lee H, Ackerman M, Doak TG, Tang H, Lynch M. 2015. Background mutational features of the radiation-resistant bacterium *Deinococcus radiodurans*. *Mol Biol Evol* **32**: 2383-2392.
- Long H, Sung W, Kucukyildirim S, Williams E, Miller SF, Guo W, Patterson C, Gregory C, Strauss C, Stone C et al. 2018. Evolutionary determinants of genome-wide nucleotide composition. *Nat Ecol Evol* **2**: 237-240.
- Long H, Sung W, Miller SF, Ackerman MS, Doak TG, Lynch M. 2014. Mutation rate, spectrum, topology, and context-dependency in the DNA mismatch repair-deficient *Pseudomonas fluorescens* ATCC948. *Genome Biol Evol* **7**: 262-271.
- Lynch M, Sung W, Morris K, Coffey N, Landry CR, Dopman EB, Dickinson WJ, Okamoto K, Kulkarni S, Hartl DL et al. 2008. A genome-wide view of the spectrum of spontaneous mutations in yeast. *Proc Natl Acad Sci USA* **105**: 9272-9277.
- Meier B, Cooke SL, Weiss J, Bailly AP, Alexandrov LB, Marshall J, Raine K, Maddison M, Anderson E, Stratton MR et al. 2014. *C. elegans* whole-genome sequencing reveals mutational signatures related to carcinogens and DNA repair deficiency. *Genome Res* **24**: 1624-1636.
- Mirouze M, Reinders J, Bucher E, Nishimura T, Schneeberger K, Ossowski S, Cao J, Weigel D, Paszkowski J, Mathieu O. 2009. Selective epigenetic control of retrotransposition in *Arabidopsis*. *Nature* **461**: 427-430.
- Ness RW, Morgan AD, Vasanthakrishnan RB, Colegrave N, Keightley PD. 2015. Extensive *de novo* mutation rate variation between individuals and across the genome of *Chlamydomonas reinhardtii*. *Genome Res* **25**: 1739-1749.
- Nishant KT, Wei W, Mancera E, Argueso JL, Schlattl A, Delhomme N, Ma X, Bustamante CD, Korbelt JO, Gu Z et al. 2010. The baker's yeast diploid genome is remarkably stable in vegetative growth and meiosis. *PLoS Genet* **6**: e1001109.
- Oppold AM, Pfenninger M. 2017. Direct estimation of the spontaneous mutation rate by short-term mutation accumulation lines in *Chironomus riparius*. *Evol Lett* **1**: 86-92.
- Ossowski S, Schneeberger K, Lucas-Lledo JI, Warthmann N, Clark RM, Shaw RG, Weigel D, Lynch M. 2010. The rate and molecular spectrum of spontaneous mutations in *Arabidopsis thaliana*. *Science* **327**: 92-94.
- Schneider TD, Stephens RM. 1990. Sequence logos: a new way to display consensus sequences. *Nucleic Acids Res* **18**: 6097-6100.
- Schrider DR, Houle D, Lynch M, Hahn MW. 2013. Rates and genomic consequences of spontaneous mutational events in *Drosophila melanogaster*. *Genetics* **194**: 937-954.

- Serero A, Jubin C, Loeillet S, Legoix-Ne P, Nicolas AG. 2014. Mutational landscape of yeast mutator strains. *Proc Natl Acad Sci USA* **111**: 1897-1902.
- Sharp NP, Agrawal AF. 2016. Low genetic quality alters key dimensions of the mutational spectrum. *PLoS Biol* **14**: e1002419.
- Sharp NP, Sandell L, James CG, Otto SP. 2018. The genome-wide rate and spectrum of spontaneous mutations differ between haploid and diploid yeast. *Proc Natl Acad Sci USA* **115**: E5046-E5055.
- Shewaramani S, Finn TJ, Leahy SC, Kassen R, Rainey PB, Moon CD. 2017. Anaerobically grown *Escherichia coli* has an enhanced mutation rate and distinct mutational spectra. *PLoS Genet* **13**: e1006570.
- Sun Y, Powell KE, Sung W, Lynch M, Moran MA, Luo H. 2017. Spontaneous mutations of a model heterotrophic marine bacterium. *ISME J* **11**: 1713-1718.
- Sung W, Ackerman MS, Dillon MM, Platt TG, Fuqua C, Cooper VS, Lynch M. 2016. Evolution of the insertion-deletion mutation rate across the tree of life. *G3 (Bethesda)* **6**: 2583-2591.
- Sung W, Ackerman MS, Miller SF, Doak TG, Lynch M. 2012. Drift-barrier hypothesis and mutation-rate evolution. *Proc Natl Acad Sci USA* **109**: 18488-18492.
- Uchimura A, Higuchi M, Minakuchi Y, Ohno M, Toyoda A, Fujiyama A, Miura I, Wakana S, Nishino J, Yagi T. 2015. Germline mutation rates and the long-term phenotypic effects of mutation accumulation in wild-type laboratory mice and mutator mice. *Genome Res* **25**: 1125-1134.
- Venn O, Turner I, Mathieson I, de Groot N, Bontrop R, McVean G. 2014. Strong male bias drives germline mutation in chimpanzees. *Science* **344**: 1272-1275.
- Xie Z, Wang L, Wang L, Wang Z, Lu Z, Tian D, Yang S, Hurst LD. 2016. Mutation rate analysis via parent-progeny sequencing of the perennial peach. I. A low rate in woody perennials and a higher mutagenicity in hybrids. *Proc Biol Sci* **283**.
- Yang S, Wang L, Huang J, Zhang X, Yuan Y, Chen JQ, Hurst LD, Tian D. 2015. Parent-progeny sequencing indicates higher mutation rates in heterozygotes. *Nature* **523**: 463-467.
- Zhu YO, Siegal ML, Hall DW, Petrov DA. 2014. Precise estimates of mutation rate and spectrum in yeast. *Proc Natl Acad Sci USA* **111**: E2310-2318.
