# Supplementary material for: Thermal stress acceleratesArabidopsis thalianamutation rate
Source: HighWire-hosted journal article supplement (doi:10.1101/gr.259853.119), 2020-12-17
Supplement: Supplemental_Tables_Final.xlsx [file Supplemental_Tables_Final.xlsx]

## Sheet: ST6-Homopolymeric analyses
Supplemental Table 6. The types of homopolymeric stretches where indels were identified in ST- and HT-grown plants are found in nucleosomic regions more than non-nucleosomic regions in the genome. (A) Table showing 11 of the 12 indels reported in ST-grown lines (Ossowski et al. 2010 and Jiang et al. 2014) are located in homopolymeric A and T stretches between 7-12 bp in length. (B) Similar to (A)…
Supplemental Table 6A
Homopolymeric sequence stretch where ST indel found	Length of homopolymer	Number of ST indels found in homopolymer of this length	ST indel sequence	Number of indel stretches found in nucleosomic regions in the reference genome	Number of indel sites found in non-nucleosomic regions of the reference genome
TTTTTTT	7	2	T	21019	16549
AAAAAAAA	8	1	A	9635	7672
TTTTTTTT	8	2	T	9659	7576
AAAAAAAAA	9	2	A	5982	5062
TTTTTTTTT	9	1	T	5920	4891
TTTTTTTTTT	10	1	T	3745	3232
AAAAAAAAAAA	11	1	A	1831	1705
AAAAAAAAAAAA	12	1	A	894	1007
Total				58685	47694
Fold difference (nucleosomic versus non-nucleosomic)				1.23045
Supplemental Table 6B
Homopolymeric sequence stretch where HT indel found	Length of homopolymer	Number of HT indels found in homopolymer of this length	HT indel sequence	Number of indel stretches found in nucleosomic regions in the reference genome	Number of indel sites found in non-nucleosomic regions of the reference genome
AAAA	4	1	A	461293	325327
AAAAAA	6	1	A	46372	34873
AAAAAAAA	8	3	A	9549	7758
AAAAAAAAA	9	5	A	5961	5083
AAAAAAAAAA	10	5	A	3732	3375
AAAAAAAAAAA	11	12	A	1837	1699
AAAAAAAAAAAA	12	8	A	904	997
AAAAAAAAAAAAA	13	3	A	550	684
AAAAAAAAAAAAAA	14	5	A	352	500
AAAAAAAAAAAAAAA	15	2	A	240	417
AAAAAAAAAAAAAAAA	16	1	A	142	388
CCCCCC	6	1	C	1003	614
GGGGGGGGGG	10	1	G	21	15
GGGGGGGGGGG	11	2	G	12	16
TTTTTTT	7	1	T	20999	16569
TTTTTTTT	8	1	T	9496	7739
TTTTTTTTT	9	3	T	5920	4891
TTTTTTTTTT	10	9	T	3750	3227
TTTTTTTTTTT	11	10	T	1754	1591
TTTTTTTTTTTTT	13	4	T	551	619
TTTTTTTTTTTTTT	14	5	T	397	458
TTTTTTTTTTTTTTT	15	1	T	256	401
TTTTTTTTTTTTTTTT	16	1	T	173	367
TTTTTTTTTTTTTTTTTTT	19	1	T	37	182
Total				575301	417790
Fold difference (nucleosomic versus non-nucleosomic)				1.37701

## Sheet: ST7-Synthetic SNV list
Supplemental Table 7. Table listing the TAIR10 reference co-ordinates of sites used to determine the SNV false negative rate of our bioinformatic pipeline. A selection of 100 SNV sites (25 each of A, T, C and G) present in coding DNA sequence (CDS); untranslated region (UTR); transposable element (TE); non-coding RNA (ncRNA), pseudogene, and pre-tRNA were chosen in the TAIR10 reference to modify …
Synthetic SNV mutation ID	Co-ordinates	Genome annotation category	TAIR10 reference base	Synthetic SNV TAIR10 refence base
1	Chr1:1587173	CDS	A	C
2	Chr2:6058431	CDS	A	G
3	Chr3:3774246	CDS	A	C
4	Chr4:5816191	CDS	A	G
5	Chr3:2926700	CDS	A	T
6	Chr2:12956150	Intergenic	A	C
7	Chr1:23289845	Intergenic	A	C
8	Chr3:22898901	Intergenic	A	G
9	Chr5:8983099	Intergenic	A	G
10	Chr2:11832986	3' UTR	A	C
11	Chr4:70482	3' UTR	A	T
12	Chr1:1587623	5' UTR	A	G
13	Chr2:15492620	5' UTR	A	G
14	Chr1:18235617	Intron	A	T
15	Chr2:8770069	Intron	A	C
16	Chr2:15888172	Intron	A	G
17	Chr4:9107359	Intron	A	C
18	Chr5:12460561	TE	A	C
19	Chr3:14919843	TE	A	G
20	Chr3:7373234	TE	A	T
21	Chr1:16200750	TE	A	G
22	Chr5:26568420	Pre-tRNA	A	C
23	Chr1:17663137	Pseudogene	A	G
24	Chr1:12034380	Pseudogene	A	G
25	Chr5:16402194	Pseudogene	A	G
26	Chr5:24738861	CDS	T	A
27	Chr5:19482393	CDS	T	A
28	Chr1:3970930	CDS	T	C
29	Chr3:18039196	CDS	T	G
30	Chr1:7215722	CDS	T	G
31	Chr2:16989199	CDS	T	C
32	Chr5:21127338	Intergenic	T	A
33	Chr2:6345786	Intergenic	T	C
34	Chr5:4903255	Intergenic	T	C
35	Chr2:7641410	Intergenic	T	G
36	Chr4:11695357	Intergenic	T	G
37	Chr4:11555963	5' UTR	T	C
38	Chr2:17127055	5' UTR	T	A
39	Chr2:1637555	3' UTR	T	C
40	Chr1:24096522	3' UTR	T	G
41	Chr5:16195321	Intron	T	A
42	Chr1:7379082	Intron	T	C
43	Chr3:2641676	Intron	T	C
44	Chr4:17200340	Intron	T	G
45	Chr1:17524296	TE	T	A
46	Chr2:2714962	TE	T	C
47	Chr4:5071859	TE	T	C
48	Chr3:12026039	TE	T	G
49	Chr5:5305216	ncRNA	T	C
50	Chr1:5529980	Pseudogene	T	C
51	Chr4:13409443	CDS	C	A
52	Chr1:20608168	CDS	C	T
53	Chr4:2259806	CDS	C	A
54	Chr5:24512278	CDS	C	G
55	Chr1:10380979	CDS	C	T
56	Chr5:4129014	Intergenic	C	A
57	Chr1:13852787	Intergenic	C	G
58	Chr1:2910976	Intergenic	C	G
59	Chr2:3192219	Intergenic	C	T
60	Chr2:8637828	3' UTR	C	T
61	Chr3:17345943	3' UTR	C	T
62	Chr4:460485	5' UTR	C	G
63	Chr1:10809129	5' UTR	C	A
64	Chr2:12058296	Intron	C	A
65	Chr1:19904872	Intron	C	T
66	Chr1:27256394	Intron	C	G
67	Chr4:9460476	Intron	C	G
68	Chr5:12701522	TE	C	G
69	Chr1:14314120	TE	C	T
70	Chr4:3104364	TE	C	A
71	Chr3:13605145	TE	C	T
72	Chr5:8468735	ncRNA	C	T
73	Chr1:17161037	Pre-tRNA	C	T
74	Chr1:21151137	Pseudogene	C	A
75	Chr2:4857056	Pseudogene	C	T
76	Chr5:20685955	CDS	G	T
77	Chr1:12393582	CDS	G	A
78	Chr3:18078084	CDS	G	C
79	Chr4:18527860	CDS	G	C
80	Chr2:13743742	CDS	G	A
81	Chr1:25464689	Intergenic	G	A
82	Chr3:1936021	Intergenic	G	C
83	Chr4:1516375	Intergenic	G	T
84	Chr5:12784571	Intergenic	G	A
85	Chr1:9507540	5' UTR	G	A
86	Chr2:10392684	3' UTR	G	A
87	Chr3:5245058	3' UTR	G	C
88	Chr5:23823204	5' UTR	G	T
89	Chr2:15984951	Intron	G	C
90	Chr3:11712042	Intron	G	T
91	Chr3:1213334	Intron	G	A
92	Chr5:8970242	Intron	G	A
93	Chr5:9981962	TE	G	A
94	Chr1:12275886	TE	G	A
95	Chr3:12286652	TE	G	C
96	Chr2:2114266	TE	G	T
97	Chr5:12351166	Pseudogene	G	C
98	Chr5:19928543	ncRNA	G	A
99	Chr3:12786297	Pseudogene	G	A
100	Chr3:22842547	Pre-tRNA	G	T

## Sheet: ST8-Synthetic indel list
Supplemental Table 8. Table listing a range of synthetic indel sizes and co-ordinates introduced into the TAIR10 reference to determine the indel false negative rate of our bioinformatic pipeline. A total of 1200 indels sites (100 each of -1, +1, -2, +2, -4, +4, -10, +10, -100, +100, -1000, and +1000 bps) were introduced into Chromosome 1 at regular intervals to create a synthetic indel TAIR10 re…
Synthetic indel mutation ID	Synthetic indel size: number of nucleotides removed (-) or inserted (+) into a synthetic indel TAIR10 reference	Chromosome 1 co-ordinates of synthetic indel introduced into the TAIR10 reference
1	-1	10000
2	-1	15000
3	-1	20000
4	-1	25000
5	-1	30000
6	-1	35000
7	-1	40000
8	-1	45000
9	-1	50000
10	-1	55000
11	-1	60000
12	-1	65000
13	-1	70000
14	-1	75000
15	-1	80000
16	-1	85000
17	-1	90000
18	-1	95000
19	-1	100000
20	-1	105000
21	-1	110000
22	-1	115000
23	-1	120000
24	-1	125000
25	-1	130000
26	-1	135000
27	-1	140000
28	-1	145000
29	-1	150000
30	-1	155000
31	-1	160000
32	-1	165000
33	-1	170000
34	-1	175000
35	-1	180000
36	-1	185000
37	-1	190000
38	-1	195000
39	-1	200000
40	-1	205000
41	-1	210000
42	-1	215000
43	-1	220000
44	-1	225000
45	-1	230000
46	-1	235000
47	-1	240000
48	-1	245000
49	-1	250000
50	-1	255000
51	-1	260000
52	-1	265000
53	-1	270000
54	-1	275000
55	-1	280000
56	-1	285000
57	-1	290000
58	-1	295000
59	-1	300000
60	-1	305000
61	-1	310000
62	-1	315000
63	-1	320000
64	-1	325000
65	-1	330000
66	-1	335000
67	-1	340000
68	-1	345000
69	-1	350000
70	-1	355000
71	-1	360000
72	-1	365000
73	-1	370000
74	-1	375000
75	-1	380000
76	-1	385000
77	-1	390000
78	-1	395000
79	-1	400000
80	-1	405000
81	-1	410000
82	-1	415000
83	-1	420000
84	-1	425000
85	-1	430000
86	-1	435000
87	-1	440000
88	-1	445000
89	-1	450000
90	-1	455000
91	-1	460000
92	-1	465000
93	-1	470000
94	-1	475000
95	-1	480000
96	-1	485000
97	-1	490000
98	-1	495000
99	-1	500000
100	-1	505000
101	+1	510000
102	+1	515000
103	+1	520000
104	+1	525000
105	+1	530000
106	+1	535000
107	+1	540000
108	+1	545000
109	+1	550000
110	+1	555000
111	+1	560000
112	+1	565000
113	+1	570000
114	+1	575000
115	+1	580000
116	+1	585000
117	+1	590000
118	+1	595000
119	+1	600000
120	+1	605000
121	+1	610000
122	+1	615000
123	+1	620000
124	+1	625000
125	+1	630000
126	+1	635000
127	+1	640000
128	+1	645000
129	+1	650000
130	+1	655000
131	+1	660000
132	+1	665000
133	+1	670000
134	+1	675000
135	+1	680000
136	+1	685000
137	+1	690000
138	+1	695000
139	+1	700000
140	+1	705000
141	+1	710000
142	+1	715000
143	+1	720000
144	+1	725000
145	+1	730000
146	+1	735000
147	+1	740000
148	+1	745000
149	+1	750000
150	+1	755000
151	+1	760000
152	+1	765000
153	+1	770000
154	+1	775000
155	+1	780000
156	+1	785000
157	+1	790000
158	+1	795000
159	+1	800000
160	+1	805000
161	+1	810000
162	+1	815000
163	+1	820000
164	+1	825000
165	+1	830000
166	+1	835000
167	+1	840000
168	+1	845000
169	+1	850000
170	+1	855000
171	+1	860000
172	+1	865000
173	+1	870000
174	+1	875000
175	+1	880000
176	+1	885000
177	+1	890000
178	+1	895000
179	+1	900000
180	+1	905000
181	+1	910000
182	+1	915000
183	+1	920000
184	+1	925000
185	+1	930000
186	+1	935000
187	+1	940000
188	+1	945000
189	+1	950000
190	+1	955000
191	+1	960000
192	+1	965000
193	+1	970000
194	+1	975000
195	+1	980000
196	+1	985000
197	+1	990000
198	+1	995000
199	+1	1000000
200	+1	1005000
201	-2	1010000
202	-2	1015000
203	-2	1020000
204	-2	1025000
205	-2	1030000
206	-2	1035000
207	-2	1040000
208	-2	1045000
209	-2	1050000
210	-2	1055000
211	-2	1060000
212	-2	1065000
213	-2	1070000
214	-2	1075000
215	-2	1080000
216	-2	1085000
217	-2	1090000
218	-2	1095000
219	-2	1100000
220	-2	1105000
221	-2	1110000
222	-2	1115000
223	-2	1120000
224	-2	1125000
225	-2	1130000
226	-2	1135000
227	-2	1140000
228	-2	1145000
229	-2	1150000
230	-2	1155000
231	-2	1160000
232	-2	1165000
233	-2	1170000
234	-2	1175000
235	-2	1180000
236	-2	1185000
237	-2	1190000
238	-2	1195000
239	-2	1200000
240	-2	1205000
241	-2	1210000
242	-2	1215000
243	-2	1220000
244	-2	1225000
245	-2	1230000
246	-2	1235000
247	-2	1240000
248	-2	1245000
249	-2	1250000
250	-2	1255000
251	-2	1260000
252	-2	1265000
253	-2	1270000
254	-2	1275000
255	-2	1280000
256	-2	1285000
257	-2	1290000
258	-2	1295000
259	-2	1300000
260	-2	1305000
261	-2	1310000
262	-2	1315000
263	-2	1320000
264	-2	1325000
265	-2	1330000
266	-2	1335000
267	-2	1340000
268	-2	1345000
269	-2	1350000
270	-2	1355000
271	-2	1360000
272	-2	1365000
273	-2	1370000
274	-2	1375000
275	-2	1380000
276	-2	1385000
277	-2	1390000
278	-2	1395000
279	-2	1400000
280	-2	1405000
281	-2	1410000
282	-2	1415000
283	-2	1420000
284	-2	1425000
285	-2	1430000
286	-2	1435000
287	-2	1440000
288	-2	1445000
289	-2	1450000
290	-2	1455000
291	-2	1460000
292	-2	1465000
293	-2	1470000
294	-2	1475000
295	-2	1480000
296	-2	1485000
297	-2	1490000
298	-2	1495000
299	-2	1500000
300	-2	1505000
301	+2	1510000
302	+2	1515000
303	+2	1520000
304	+2	1525000
305	+2	1530000
306	+2	1535000
307	+2	1540000
308	+2	1545000
309	+2	1550000
310	+2	1555000
311	+2	1560000
312	+2	1565000
313	+2	1570000
314	+2	1575000
315	+2	1580000
316	+2	1585000
317	+2	1590000
318	+2	1595000
319	+2	1600000
320	+2	1605000
321	+2	1610000
322	+2	1615000
323	+2	1620000
324	+2	1625000
325	+2	1630000
326	+2	1635000
327	+2	1640000
328	+2	1645000
329	+2	1650000
330	+2	1655000
331	+2	1660000
332	+2	1665000
333	+2	1670000
334	+2	1675000
335	+2	1680000
336	+2	1685000
337	+2	1690000
338	+2	1695000
339	+2	1700000
340	+2	1705000
341	+2	1710000
342	+2	1715000
343	+2	1720000
344	+2	1725000
345	+2	1730000
346	+2	1735000
347	+2	1740000
348	+2	1745000
349	+2	1750000
350	+2	1755000
351	+2	1760000
352	+2	1765000
353	+2	1770000
354	+2	1775000
355	+2	1780000
356	+2	1785000
357	+2	1790000
358	+2	1795000
359	+2	1800000
360	+2	1805000
361	+2	1810000
362	+2	1815000
363	+2	1820000
364	+2	1825000
365	+2	1830000
366	+2	1835000
367	+2	1840000
368	+2	1845000
369	+2	1850000
370	+2	1855000
371	+2	1860000
372	+2	1865000
373	+2	1870000
374	+2	1875000
375	+2	1880000
376	+2	1885000
377	+2	1890000
378	+2	1895000
379	+2	1900000
380	+2	1905000
381	+2	1910000
382	+2	1915000
383	+2	1920000
384	+2	1925000
385	+2	1930000
386	+2	1935000
387	+2	1940000
388	+2	1945000
389	+2	1950000
390	+2	1955000
391	+2	1960000
392	+2	1965000
393	+2	1970000
394	+2	1975000
395	+2	1980000
396	+2	1985000
397	+2	1990000
398	+2	1995000
399	+2	2000000
400	+2	2005000
401	-4	2010000
402	-4	2015000
403	-4	2020000
404	-4	2025000
405	-4	2030000
406	-4	2035000
407	-4	2040000
408	-4	2045000
409	-4	2050000
410	-4	2055000
411	-4	2060000
412	-4	2065000
413	-4	2070000
414	-4	2075000
415	-4	2080000
416	-4	2085000
417	-4	2090000
418	-4	2095000
419	-4	2100000
420	-4	2105000
421	-4	2110000
422	-4	2115000
423	-4	2120000
424	-4	2125000
425	-4	2130000
426	-4	2135000
427	-4	2140000
428	-4	2145000
429	-4	2150000
430	-4	2155000
431	-4	2160000
432	-4	2165000
433	-4	2170000
434	-4	2175000
435	-4	2180000
436	-4	2185000
437	-4	2190000
438	-4	2195000
439	-4	2200000
440	-4	2205000
441	-4	2210000
442	-4	2215000
443	-4	2220000
444	-4	2225000
445	-4	2230000
446	-4	2235000
447	-4	2240000
448	-4	2245000
449	-4	2250000
450	-4	2255000
451	-4	2260000
452	-4	2265000
453	-4	2270000
454	-4	2275000
455	-4	2280000
456	-4	2285000
457	-4	2290000
458	-4	2295000
459	-4	2300000
460	-4	2305000
461	-4	2310000
462	-4	2315000
463	-4	2320000
464	-4	2325000
465	-4	2330000
466	-4	2335000
467	-4	2340000
468	-4	2345000
469	-4	2350000
470	-4	2355000
471	-4	2360000
472	-4	2365000
473	-4	2370000
474	-4	2375000
475	-4	2380000
476	-4	2385000
477	-4	2390000
478	-4	2395000
479	-4	2400000
480	-4	2405000
481	-4	2410000
482	-4	2415000
483	-4	2420000
484	-4	2425000
485	-4	2430000
486	-4	2435000
487	-4	2440000
488	-4	2445000
489	-4	2450000
490	-4	2455000
491	-4	2460000
492	-4	2465000
493	-4	2470000
494	-4	2475000
495	-4	2480000
496	-4	2485000
497	-4	2490000
498	-4	2495000
499	-4	2500000
500	-4	2505000
501	+4	2510000
502	+4	2515000
503	+4	2520000
504	+4	2525000
505	+4	2530000
506	+4	2535000
507	+4	2540000
508	+4	2545000
509	+4	2550000
510	+4	2555000
511	+4	2560000
512	+4	2565000
513	+4	2570000
514	+4	2575000
515	+4	2580000
516	+4	2585000
517	+4	2590000
518	+4	2595000
519	+4	2600000
520	+4	2605000
521	+4	2610000
522	+4	2615000
523	+4	2620000
524	+4	2625000
525	+4	2630000
526	+4	2635000
527	+4	2640000
528	+4	2645000
529	+4	2650000
530	+4	2655000
531	+4	2660000
532	+4	2665000
533	+4	2670000
534	+4	2675000
535	+4	2680000
536	+4	2685000
537	+4	2690000
538	+4	2695000
539	+4	2700000
540	+4	2705000
541	+4	2710000
542	+4	2715000
543	+4	2720000
544	+4	2725000
545	+4	2730000
546	+4	2735000
547	+4	2740000
548	+4	2745000
549	+4	2750000
550	+4	2755000
551	+4	2760000
552	+4	2765000
553	+4	2770000
554	+4	2775000
555	+4	2780000
556	+4	2785000
557	+4	2790000
558	+4	2795000
559	+4	2800000
560	+4	2805000
561	+4	2810000
562	+4	2815000
563	+4	2820000
564	+4	2825000
565	+4	2830000
566	+4	2835000
567	+4	2840000
568	+4	2845000
569	+4	2850000
570	+4	2855000
571	+4	2860000
572	+4	2865000
573	+4	2870000
574	+4	2875000
575	+4	2880000
576	+4	2885000
577	+4	2890000
578	+4	2895000
579	+4	2900000
580	+4	2905000
581	+4	2910000
582	+4	2915000
583	+4	2920000
584	+4	2925000
585	+4	2930000
586	+4	2935000
587	+4	2940000
588	+4	2945000
589	+4	2950000
590	+4	2955000
591	+4	2960000
592	+4	2965000
593	+4	2970000
594	+4	2975000
595	+4	2980000
596	+4	2985000
597	+4	2990000
598	+4	2995000
599	+4	3000000
600	+4	3005000
601	-10	3010000
602	-10	3015000
603	-10	3020000
604	-10	3025000
605	-10	3030000
606	-10	3035000
607	-10	3040000
608	-10	3045000
609	-10	3050000
610	-10	3055000
611	-10	3060000
612	-10	3065000
613	-10	3070000
614	-10	3075000
615	-10	3080000
616	-10	3085000
617	-10	3090000
618	-10	3095000
619	-10	3100000
620	-10	3105000
621	-10	3110000
622	-10	3115000
623	-10	3120000
624	-10	3125000
625	-10	3130000
626	-10	3135000
627	-10	3140000
628	-10	3145000
629	-10	3150000
630	-10	3155000
631	-10	3160000
632	-10	3165000
633	-10	3170000
634	-10	3175000
635	-10	3180000
636	-10	3185000
637	-10	3190000
638	-10	3195000
639	-10	3200000
640	-10	3205000
641	-10	3210000
642	-10	3215000
643	-10	3220000
644	-10	3225000
645	-10	3230000
646	-10	3235000
647	-10	3240000
648	-10	3245000
649	-10	3250000
650	-10	3255000
651	-10	3260000
652	-10	3265000
653	-10	3270000
654	-10	3275000
655	-10	3280000
656	-10	3285000
657	-10	3290000
658	-10	3295000
659	-10	3300000
660	-10	3305000
661	-10	3310000
662	-10	3315000
663	-10	3320000
664	-10	3325000
665	-10	3330000
666	-10	3335000
667	-10	3340000
668	-10	3345000
669	-10	3350000
670	-10	3355000
671	-10	3360000
672	-10	3365000
673	-10	3370000
674	-10	3375000
675	-10	3380000
676	-10	3385000
677	-10	3390000
678	-10	3395000
679	-10	3400000
680	-10	3405000
681	-10	3410000
682	-10	3415000
683	-10	3420000
684	-10	3425000
685	-10	3430000
686	-10	3435000
687	-10	3440000
688	-10	3445000
689	-10	3450000
690	-10	3455000
691	-10	3460000
692	-10	3465000
693	-10	3470000
694	-10	3475000
695	-10	3480000
696	-10	3485000
697	-10	3490000
698	-10	3495000
699	-10	3500000
700	-10	3505000
701	+10	3510000
702	+10	3515000
703	+10	3520000
704	+10	3525000
705	+10	3530000
706	+10	3535000
707	+10	3540000
708	+10	3545000
709	+10	3550000
710	+10	3555000
711	+10	3560000
712	+10	3565000
713	+10	3570000
714	+10	3575000
715	+10	3580000
716	+10	3585000
717	+10	3590000
718	+10	3595000
719	+10	3600000
720	+10	3605000
721	+10	3610000
722	+10	3615000
723	+10	3620000
724	+10	3625000
725	+10	3630000
726	+10	3635000
727	+10	3640000
728	+10	3645000
729	+10	3650000
730	+10	3655000
731	+10	3660000
732	+10	3665000
733	+10	3670000
734	+10	3675000
735	+10	3680000
736	+10	3685000
737	+10	3690000
738	+10	3695000
739	+10	3700000
740	+10	3705000
741	+10	3710000
742	+10	3715000
743	+10	3720000
744	+10	3725000
745	+10	3730000
746	+10	3735000
747	+10	3740000
748	+10	3745000
749	+10	3750000
750	+10	3755000
751	+10	3760000
752	+10	3765000
753	+10	3770000
754	+10	3775000
755	+10	3780000
756	+10	3785000
757	+10	3790000
758	+10	3795000
759	+10	3800000
760	+10	3805000
761	+10	3810000
762	+10	3815000
763	+10	3820000
764	+10	3825000
765	+10	3830000
766	+10	3835000
767	+10	3840000
768	+10	3845000
769	+10	3850000
770	+10	3855000
771	+10	3860000
772	+10	3865000
773	+10	3870000
774	+10	3875000
775	+10	3880000
776	+10	3885000
777	+10	3890000
778	+10	3895000
779	+10	3900000
780	+10	3905000
781	+10	3910000
782	+10	3915000
783	+10	3920000
784	+10	3925000
785	+10	3930000
786	+10	3935000
787	+10	3940000
788	+10	3945000
789	+10	3950000
790	+10	3955000
791	+10	3960000
792	+10	3965000
793	+10	3970000
794	+10	3975000
795	+10	3980000
796	+10	3985000
797	+10	3990000
798	+10	3995000
799	+10	4000000
800	+10	4005000
801	-100	4010000
802	-100	4015000
803	-100	4020000
804	-100	4025000
805	-100	4030000
806	-100	4035000
807	-100	4040000
808	-100	4045000
809	-100	4050000
810	-100	4055000
811	-100	4060000
812	-100	4065000
813	-100	4070000
814	-100	4075000
815	-100	4080000
816	-100	4085000
817	-100	4090000
818	-100	4095000
819	-100	4100000
820	-100	4105000
821	-100	4110000
822	-100	4115000
823	-100	4120000
824	-100	4125000
825	-100	4130000
826	-100	4135000
827	-100	4140000
828	-100	4145000
829	-100	4150000
830	-100	4155000
831	-100	4160000
832	-100	4165000
833	-100	4170000
834	-100	4175000
835	-100	4180000
836	-100	4185000
837	-100	4190000
838	-100	4195000
839	-100	4200000
840	-100	4205000
841	-100	4210000
842	-100	4215000
843	-100	4220000
844	-100	4225000
845	-100	4230000
846	-100	4235000
847	-100	4240000
848	-100	4245000
849	-100	4250000
850	-100	4255000
851	-100	4260000
852	-100	4265000
853	-100	4270000
854	-100	4275000
855	-100	4280000
856	-100	4285000
857	-100	4290000
858	-100	4295000
859	-100	4300000
860	-100	4305000
861	-100	4310000
862	-100	4315000
863	-100	4320000
864	-100	4325000
865	-100	4330000
866	-100	4335000
867	-100	4340000
868	-100	4345000
869	-100	4350000
870	-100	4355000
871	-100	4360000
872	-100	4365000
873	-100	4370000
874	-100	4375000
875	-100	4380000
876	-100	4385000
877	-100	4390000
878	-100	4395000
879	-100	4400000
880	-100	4405000
881	-100	4410000
882	-100	4415000
883	-100	4420000
884	-100	4425000
885	-100	4430000
886	-100	4435000
887	-100	4440000
888	-100	4445000
889	-100	4450000
890	-100	4455000
891	-100	4460000
892	-100	4465000
893	-100	4470000
894	-100	4475000
895	-100	4480000
896	-100	4485000
897	-100	4490000
898	-100	4495000
899	-100	4500000
900	-100	4505000
901	+100	4510000
902	+100	4515000
903	+100	4520000
904	+100	4525000
905	+100	4530000
906	+100	4535000
907	+100	4540000
908	+100	4545000
909	+100	4550000
910	+100	4555000
911	+100	4560000
912	+100	4565000
913	+100	4570000
914	+100	4575000
915	+100	4580000
916	+100	4585000
917	+100	4590000
918	+100	4595000
919	+100	4600000
920	+100	4605000
921	+100	4610000
922	+100	4615000
923	+100	4620000
924	+100	4625000
925	+100	4630000
926	+100	4635000
927	+100	4640000
928	+100	4645000
929	+100	4650000
930	+100	4655000
931	+100	4660000
932	+100	4665000
933	+100	4670000
934	+100	4675000
935	+100	4680000
936	+100	4685000
937	+100	4690000
938	+100	4695000
939	+100	4700000
940	+100	4705000
941	+100	4710000
942	+100	4715000
943	+100	4720000
944	+100	4725000
945	+100	4730000
946	+100	4735000
947	+100	4740000
948	+100	4745000
949	+100	4750000
950	+100	4755000
951	+100	4760000
952	+100	4765000
953	+100	4770000
954	+100	4775000
955	+100	4780000
956	+100	4785000
957	+100	4790000
958	+100	4795000
959	+100	4800000
960	+100	4805000
961	+100	4810000
962	+100	4815000
963	+100	4820000
964	+100	4825000
965	+100	4830000
966	+100	4835000
967	+100	4840000
968	+100	4845000
969	+100	4850000
970	+100	4855000
971	+100	4860000
972	+100	4865000
973	+100	4870000
974	+100	4875000
975	+100	4880000
976	+100	4885000
977	+100	4890000
978	+100	4895000
979	+100	4900000
980	+100	4905000
981	+100	4910000
982	+100	4915000
983	+100	4920000
984	+100	4925000
985	+100	4930000
986	+100	4935000
987	+100	4940000
988	+100	4945000
989	+100	4950000
990	+100	4955000
991	+100	4960000
992	+100	4965000
993	+100	4970000
994	+100	4975000
995	+100	4980000
996	+100	4985000
997	+100	4990000
998	+100	4995000
999	+100	5000000
1000	+100	5005000
1001	-1000	6010000
1002	-1000	6015000
1003	-1000	6020000
1004	-1000	6025000
1005	-1000	6030000
1006	-1000	6035000
1007	-1000	6040000
1008	-1000	6045000
1009	-1000	6050000
1010	-1000	6055000
1011	-1000	6060000
1012	-1000	6065000
1013	-1000	6070000
1014	-1000	6075000
1015	-1000	6080000
1016	-1000	6085000
1017	-1000	6090000
1018	-1000	6095000
1019	-1000	6100000
1020	-1000	6105000
1021	-1000	6110000
1022	-1000	6115000
1023	-1000	6120000
1024	-1000	6125000
1025	-1000	6130000
1026	-1000	6135000
1027	-1000	6140000
1028	-1000	6145000
1029	-1000	6150000
1030	-1000	6155000
1031	-1000	6160000
1032	-1000	6165000
1033	-1000	6170000
1034	-1000	6175000
1035	-1000	6180000
1036	-1000	6185000
1037	-1000	6190000
1038	-1000	6195000
1039	-1000	6200000
1040	-1000	6205000
1041	-1000	6210000
1042	-1000	6215000
1043	-1000	6220000
1044	-1000	6225000
1045	-1000	6230000
1046	-1000	6235000
1047	-1000	6240000
1048	-1000	6245000
1049	-1000	6250000
1050	-1000	6255000
1051	-1000	6260000
1052	-1000	6265000
1053	-1000	6270000
1054	-1000	6275000
1055	-1000	6280000
1056	-1000	6285000
1057	-1000	6290000
1058	-1000	6295000
1059	-1000	6300000
1060	-1000	6305000
1061	-1000	6310000
1062	-1000	6315000
1063	-1000	6320000
1064	-1000	6325000
1065	-1000	6330000
1066	-1000	6335000
1067	-1000	6340000
1068	-1000	6345000
1069	-1000	6350000
1070	-1000	6355000
1071	-1000	6360000
1072	-1000	6365000
1073	-1000	6370000
1074	-1000	6375000
1075	-1000	6380000
1076	-1000	6385000
1077	-1000	6390000
1078	-1000	6395000
1079	-1000	6400000
1080	-1000	6405000
1081	-1000	6410000
1082	-1000	6415000
1083	-1000	6420000
1084	-1000	6425000
1085	-1000	6430000
1086	-1000	6435000
1087	-1000	6440000
1088	-1000	6445000
1089	-1000	6450000
1090	-1000	6455000
1091	-1000	6460000
1092	-1000	6465000
1093	-1000	6470000
1094	-1000	6475000
1095	-1000	6480000
1096	-1000	6485000
1097	-1000	6490000
1098	-1000	6495000
1099	-1000	6500000
1100	-1000	6505000
1101	+1000	6510000
1102	+1000	6515000
1103	+1000	6520000
1104	+1000	6525000
1105	+1000	6530000
1106	+1000	6535000
1107	+1000	6540000
1108	+1000	6545000
1109	+1000	6550000
1110	+1000	6555000
1111	+1000	6560000
1112	+1000	6565000
1113	+1000	6570000
1114	+1000	6575000
1115	+1000	6580000
1116	+1000	6585000
1117	+1000	6590000
1118	+1000	6595000
1119	+1000	6600000
1120	+1000	6605000
1121	+1000	6610000
1122	+1000	6615000
1123	+1000	6620000
1124	+1000	6625000
1125	+1000	6630000
1126	+1000	6635000
1127	+1000	6640000
1128	+1000	6645000
1129	+1000	6650000
1130	+1000	6655000
1131	+1000	6660000
1132	+1000	6665000
1133	+1000	6670000
1134	+1000	6675000
1135	+1000	6680000
1136	+1000	6685000
1137	+1000	6690000
1138	+1000	6695000
1139	+1000	6700000
1140	+1000	6705000
1141	+1000	6710000
1142	+1000	6715000
1143	+1000	6720000
1144	+1000	6725000
1145	+1000	6730000
1146	+1000	6735000
1147	+1000	6740000
1148	+1000	6745000
1149	+1000	6750000
1150	+1000	6755000
1151	+1000	6760000
1152	+1000	6765000
1153	+1000	6770000
1154	+1000	6775000
1155	+1000	6780000
1156	+1000	6785000
1157	+1000	6790000
1158	+1000	6795000
1159	+1000	6800000
1160	+1000	6805000
1161	+1000	6810000
1162	+1000	6815000
1163	+1000	6820000
1164	+1000	6825000
1165	+1000	6830000
1166	+1000	6835000
1167	+1000	6840000
1168	+1000	6845000
1169	+1000	6850000
1170	+1000	6855000
1171	+1000	6860000
1172	+1000	6865000
1173	+1000	6870000
1174	+1000	6875000
1175	+1000	6880000
1176	+1000	6885000
1177	+1000	6890000
1178	+1000	6895000
1179	+1000	6900000
1180	+1000	6905000
1181	+1000	6910000
1182	+1000	6915000
1183	+1000	6920000
1184	+1000	6925000
1185	+1000	6930000
1186	+1000	6935000
1187	+1000	6940000
1188	+1000	6945000
1189	+1000	6950000
1190	+1000	6955000
1191	+1000	6960000
1192	+1000	6965000
1193	+1000	6970000
1194	+1000	6975000
1195	+1000	6980000
1196	+1000	6985000
1197	+1000	6990000
1198	+1000	6995000
1199	+1000	7000000
1200	+1000	7005000

## Sheet: ST9-Synthetic insertion seq's
Supplemental Table 9. DNA sequences inserted into TAIR10 to create a synthetic indel TAIR10 reference. Table shows the DNA sequences used to create 100 each of +1, +2, +4, +10, +100, and +1000 bps insertions in Chromosome 1.
Insertion size	Insertion sequence
1	A
2	AC
4	ACTG
10	ACTGACTGAC
100	ACTGACTGACACTGACTGACACTGACTGACACTGACTGACACTGACTGACACTGACTGACACTGACTGACACTGACTGACACTGACTGACACTGACTGAC
1000	ACTGACTGACACTGACTGACACTGACTGACACTGACTGACACTGACTGACACTGACTGACACTGACTGACACTGACTGACACTGACTGACACTGACTGACACTGACTGACACTGACTGACACTGACTGACACTGACTGACACTGACTGACACTGACTGACACTGACTGACACTGACTGACACTGACTGACACTGACTGACACTGACTGACACTGACTGACACTGACTGACACTGACTGACACTGACTGACACTGACTGACACTGACTGACACTGACTGACACTGACTGACACTGACTGACACTGACTGACACTGACTGACACTGACTGACACTGACTGACACTGACTGACACTGACTGACACTGACTGACACTGACTGACACTGACTGACACTGACTGA…

## Sheet: ST10-Syn microsatellite analys
Supplemental Table 10. Microsatellites indel false negative rate analyses. WGS datasets (Gen-0 [Jiang et al. 2014] and 6 HT MA lines) were aligned to a synthetic microsatellite TAIR10 reference and mutations called. The number of synthetic microsatellite indels bioinformatically called for each dataset are shown. The false negative rates for each WGS dataset are listed along with the overall fals…
							Microsatellite indels identification in plant lines
Chromosome and position	Microsatellite sequence	Location	Number of bases removed from TAIR10 reference	Number of bases inserted into TAIR10 reference	TAIR 10 reference sequence	Modified TAIR 10 reference sequence	Gen-0	T29G11-1	T29G11-11	T29G11-15	T29G11-18	T29G11-20	T29G11-21	False negatives	Indels bioinformaticly confirmed	False negative %
Chr4:15394126	AT	UTR	2		GAGAGATATATATATATATATAGAGA	GAGAGATATATATATATATAGAGA	yes	yes	yes	yes	yes	yes	no	1	6	0.142857
Chr3:7905919	TA	Intergenic	4		AATTGTATATATATATATATAATGTT	AATTGTATATATATATAATGTT	yes	yes	yes	no	yes	yes	no	2	5	0.285714
Chr3:21676382	TA	Intergenic	6		CTCTCTATATATATATATATATATCAAA	CTCTCTATATATATATATCAAA	no	yes	no	no	yes	yes	yes	3	4	0.428571
Chr1:16342316	GA	Intergenic	8		GTGAGGAGAGAGAGAGAGAGAGAGAGTCAA	GTGAGGAGAGAGAGAGAGTCAA	no	yes	no	no	yes	yes	yes	3	4	0.428571
Chr1:20593095	CT	Intergenic	10		TGACCCTCTCTCTCTCTCTCTCTCTTTGTT	TGACCCTCTCTCTCTTTGTT	yes	yes	no	no	yes	yes	yes	2	5	0.285714
Chr4:18453389	AT	Intergenic	12		CACACATATATATATATATATATATATATACTCA	CACACATATATATATATACTCA	yes	yes	no	no	yes	yes	no	3	4	0.428571
Chr2:683661	TC	UTR		2	CTCTTTCTCTCTCTCTCTCTCTCTCTCTTTAT	CTCTTtcTCTCTCTCTCTCTCTCTCTCTCTTTAT	yes	yes	yes	no	yes	yes	yes	1	6	0.142857
Chr3:18782079	AT	Intergenic		4	AAAGAATATATATATATTTCGT	AAAGAatatATATATATATATTTCGT	yes	yes	yes	yes	yes	yes	yes	0	7	0
Chr1:22232997	AT	Intergenic		6	TATGAATATATATATATATATGGTAC	TATGAatatatATATATATATATATATGGTAC	no	no	yes	no	yes	no	yes	4	3	0.571429
Chr3:832839	TA	Intergenic		8	CTATCTATATATATATATCTCC	CTATCtatatataTATATATATATATCTCC	yes	yes	yes	yes	yes	yes	yes	0	7	0
Chr3:12691899	TA	Intergenic		10	TCTCTTATATATATATATATAAGAGA	TCTCTtatatatataTATATATATATATATAAGAGA	yes	no	no	no	yes	yes	yes	3	4	0.428571
Chr2:10205930	TA	Intron		12	GCTTTATATATATATATATATATATCCTTG	GCTTTatatatatatatATATATATATATATATATATCCTTG	yes	yes	yes	yes	yes	yes	yes	0	7	0
Overall microsatellite indel false negative rate																0.261905
References
Jiang C, Mithani A, Belfield EJ, Mott R, Hurst LD, Harberd NP. 2014. Environmentally responsive genome-wide accumulation of de novo Arabidopsis thaliana mutations and epimutations. Genome Res 24: 1821-1829.

## Sheet: ST11-Synthetic SNV analyses
Supplemental Table 11. SNV false negative rates for our bioinformatic pipeline. WGS datasets (Gen-0 [Jiang et al. 2014]; and 6 HT MA lines) were aligned to a synthetic SNV TAIR10 reference (see Supplemental Table 7). The number of synthetic SNVs that were bioinformatically called for each dataset (100 SNV sites per dataset) by our pipeline are shown. The false negative rates for each genome categ…
	Plant line
	Gen-0		T29G11-1		T29G11-11		T29G11-15		T29G11-18		T29G11-20		T29G11-21
Synthetic SNV mutation genome annotation category	Number of SNVs bioinformaticly confirmed	Number of false negatives	Number of SNVs bioinformaticly confirmed	Number of false negatives	Number of SNVs bioinformaticly confirmed	Number of false negatives	Number of SNVs bioinformaticly confirmed	Number of false negatives	Number of SNVs bioinformaticly confirmed	Number of false negatives	Number of SNVs bioinformaticly confirmed	Number of false negatives	Number of SNVs bioinformaticly confirmed	Number of false negatives	False negative rate
3' UTR	8	0	8	0	8	0	8	0	8	0	8	0	8	0	0
5' UTR	8	0	8	0	8	0	8	0	8	0	8	0	8	0	0
CDS	21	0	21	0	21	0	21	0	21	0	21	0	21	0	0
Intergenic	17	0	17	0	17	0	17	0	17	0	17	0	17	0	0
Intron	16	0	16	0	16	0	16	0	16	0	16	0	16	0	0
ncRNA	3	0	3	0	3	0	3	0	3	0	3	0	3	0	0
Other	3	0	3	0	3	0	3	0	3	0	3	0	3	0	0
Pseudogene	8	0	8	0	8	0	8	0	8	0	8	0	8	0	0
TE	14	2	16	0	16	0	16	0	16	0	16	0	16	0	0.0178571
Total	98	2	100	0	100	0	100	0	100	0	100	0	100	0
Overall SNV false negative rate															0.00285714
References
Jiang C, Mithani A, Belfield EJ, Mott R, Hurst LD, Harberd NP. 2014. Environmentally responsive genome-wide accumulation of de novo Arabidopsis thaliana mutations and epimutations. Genome Res 24: 1821-1829.

## Sheet: ST12-Synthetic indel analyses
Supplemental Table 12. Indel false negative rates of our bioinformatic pipeline. (A) A table listing one hundred 1, 2, 4, 10, 100 and 1000 bp synthetic DNA insertions and deletions that were artificially introduced into Chromosome 1 of the TAIR10 reference. Following alignment of the seven WGS DNA sequencing datasets used in this study (A. thaliana Col-0 ancestor [Jiang et al. 2014] and six HT MA…
Supplemental Table 12A
	Plant line
	Gen-0		T29G11-1		T29G11-11		T29G11-15		T29G11-18		T29G11-20		T29G11-21
Synthetic indel size (number of nucleotides)	Number of indels bioinformaticly confirmed	False negatives	Number of indels bioinformaticly confirmed	False negatives	Number of indels bioinformaticly confirmed	False negatives	Number of indels bioinformaticly confirmed	False negatives	Number of indels bioinformaticly confirmed	False negatives	Number of indels bioinformaticly confirmed	False negatives	Number of indels bioinformaticly confirmed	False negatives	Total
-1	99	1	99	1	98	2	98	2	100	0	100	0	100	0	700
+1	100	0	100	0	100	0	100	0	100	0	100	0	100	0	700
-2	100	0	100	0	100	0	100	0	100	0	100	0	100	0	700
+2	100	0	99	1	99	1	99	1	100	0	99	1	100	0	700
-4	85	15	93	7	96	4	94	6	97	3	94	6	97	3	700
+4	91	9	94	6	98	2	94	6	99	1	93	7	93	7	700
-10	97	3	95	5	98	2	89	11	96	4	93	7	93	7	700
+10	93	7	99	1	100	0	94	6	100	0	97	3	100	0	700
-100	87	13	91	9	98	2	93	7	96	4	99	1	97	3	700
+100	91	9	92	8	96	4	95	5	95	5	93	7	94	6	700
-1000	73	27	89	11	90	10	82	18	88	12	91	9	86	14	700
+1000	23	77	52	48	76	24	36	64	69	31	60	40	55	45	700
Total	1039	161	1103	97	1149	51	1074	126	1140	60	1119	81	1115	85	8400
Supplemental Table 12B
Mutation	False negative rate
All indels	0.033
Deletions only	0.0365714
Insertions only	0.0294286
Supplemental Table 12C
Mutations	False negative rate
All indels	0.0786905
Deletions only	0.0545238
Insertions only	0.102857
References
Jiang C, Mithani A, Belfield EJ, Mott R, Hurst LD, Harberd NP. 2014. Environmentally responsive genome-wide accumulation of de novo Arabidopsis thaliana mutations and epimutations. Genome Res 24: 1821-1829.
Robinson JT, Thorvaldsdóttir H, Winckler W, Guttman M, Lander ES, Getz G, Mesirov JP. 2011. Integrative genomics viewer. Nat Biotechnol 29: 24-26.
